# Evolution of ecological dominance of yeast species in high-sugar environments

Kathryn M. Williams<sup>1</sup>, Ping Liu<sup>2</sup> and Justin C. Fay<sup>2,3</sup>

<sup>1</sup>Evolution, Ecology and Population Biology Program, Washington University, St. Louis, MO

<sup>2</sup>Department of Genetics, Washington University, St. Louis, MO

<sup>3</sup>Center for Genome Sciences and Systems Biology, Washington University, St. Louis, MO

Corresponding Author: Kathryn Williams

4444 Forest Park Ave.

St. Louis, MO 63108

Phone: 314-747-1802

Email: [kathrynmrwilliams@gmail.com](mailto:kathrynmrwilliams@gmail.com)

Running title: Evolution of yeast dominance

Keywords: wine, innovation, competition, fermentation, genome duplication

Data will be deposited into Dryad

Word count: 7,466

Table count: 0 (Supplementary Information: 9)

Figure count: 7 (Supplementary Information: 5)

## Abstract

In budding yeasts, fermentation in the presence of oxygen evolved around the time of a whole genome duplication (WGD) and is thought to confer dominance in high-sugar environments because ethanol is toxic to many species. While there are many fermentative yeast species, only *Saccharomyces cerevisiae* consistently dominates wine fermentations. In this study, we use co-culture experiments and intrinsic growth rate assays to examine the relative fitness of non-WGD and WGD yeast species across environments to assess when *S. cerevisiae*'s ability to dominate high-sugar environments arose. We show that *S. cerevisiae* dominates nearly all other non-WGD and WGD species except for its sibling species *S. paradoxus* in both grape juice and a high-sugar rich medium. Of the species we tested, *S. cerevisiae* and *S. paradoxus* have evolved the highest ethanol tolerance and intrinsic growth rate in grape juice. However, the ability of *S. cerevisiae* and *S. paradoxus* to dominate certain species depends on the temperature and the type of high-sugar environment. Our results indicate that dominance of high-sugar environments evolved much more recently than the WGD, most likely just prior to or during the differentiation of *Saccharomyces* species, and that evolution of multiple traits contributes to *S. cerevisiae*'s ability to dominate wine fermentations.

## 38 Introduction

39

40 Evolutionary innovation can promote the ecological dominance of some lineages  
 41 by enabling them to occupy new niches. While conservation of an innovation among  
 42 descendent taxa reflects its contribution to their ecological success, ecological dominance  
 43 may not be an immediate consequence of evolutionary innovation. Phylogenetic studies  
 44 indicate that the current dominance of some lineages may result from events temporally  
 45 distinct from major evolutionary transitions (Wing and Boucher 1998; Alfaro et al. 2009;  
 46 Edwards et al. 2010; Near et al. 2012; Schranz et al. 2012; Bouchenak-Khelladi et al.  
 47 2014). This apparent lag between the evolution of an innovation and the rise to  
 48 dominance of descendent lineages may occur because dominance depends upon certain  
 49 environments, ecological communities or the acquisition of additional traits.

50 In budding yeasts, evolution of the ability to ferment sugar in the presence of  
 51 oxygen dramatically changed the way some species harness energy. Whereas most  
 52 species acquire energy through respiration in the presence of oxygen, certain species such  
 53 as *Saccharomyces cerevisiae* acquire most of their energy via the less efficient process of  
 54 fermentation (Pronk et al. 1996). Evolution of this fermentative lifestyle likely involved  
 55 multiple steps both before and after a whole genome duplication (WGD) in the yeast  
 56 lineage, including the ability to grow without mitochondrial electron transport and the  
 57 transcriptional rewiring of carbon metabolizing enzymes (Ihmels et al. 2005; Merico et  
 58 al. 2007; Field et al. 2009; Hagman et al. 2013; Lin et al. 2013). While the evolutionary  
 59 transition to a fermentative lifestyle began prior to the WGD, lineages that diverged after

60 the WGD show a clear preference for fermentation in the presence of oxygen (Merico et  
61 al. 2007; Hagman et al. 2013).

62 Fermentation in the presence of oxygen is thought to provide WGD yeast species  
63 with a fitness advantage in high-sugar environments such as grape juice (Wolfe and  
64 Shields 1997; Piskur and Langkjaer 2004; Thomson et al. 2005; Piskur et al. 2006;  
65 Conant and Wolfe 2007). Theoretical modeling shows that a fermentative lifestyle can  
66 yield a growth advantage in high-sugar environments due to a higher rate of sugar  
67 consumption and energy production (Pfeiffer et al. 2001; MacLean and Gudelj 2006;  
68 Conant and Wolfe 2007). Additionally, ethanol produced during fermentation may inhibit  
69 the growth of competitor species (Gause 1934; Piskur and Langkjaer 2004; Thomson et  
70 al. 2005; Piskur et al. 2006). Thus, the fermentative lifestyle is expected to enable WGD  
71 species to dominate high-sugar environments like grape juice.

72 While *S. cerevisiae* has been shown to dominate competitions with multiple non-  
73 WGD species (Holm Hansen et al. 2001; Pérez-Nevado et al. 2006), the importance of  
74 the fermentative lifestyle remains equivocal. Competition experiments between *S.*  
75 *cerevisiae* and several non-WGD species did not support the role of ethanol but instead  
76 implicate different factors depending upon which competitor species was used.  
77 Competitions with *Torulaspora delbrueckii* and *Lachancea thermotolerans* demonstrated  
78 that low-oxygen and cell-density contribute to *S. cerevisiae*'s dominance (Holm Hansen  
79 et al. 2001; Nissen et al. 2003, 2004), while competitions with *Hanseniaspora*  
80 *guilliermondii* and *H. uvarum* showed that *S. cerevisiae* produces a toxic metabolite  
81 derived from glyceraldehyde 3-phosphate dehydrogenase peptides (Pérez-Nevado et al.

2006; Albergaria et al. 2010; Branco et al. 2014). While *S. cerevisiae* exhibits high-ethanol tolerance (Pina et al. 2004; Belloch et al. 2008; Arroyo-López et al. 2010; Salvadó et al. 2011a), mono-culture growth rates of various species indicate that temperature is more important to *S. cerevisiae*'s dominance than ethanol tolerance (Goddard 2008; Salvadó et al. 2011a).

Within the vineyard environment, grapes and wine musts contain hundreds of yeast species, including a number of fermentative species (Pretorius 2000; Fleet 2003, 2008; Jolly et al. 2006; Bokulich et al. 2012; Pinto et al. 2014). Yet, even without the introduction of commercial wine yeast, *S. cerevisiae* consistently dominates grape juice as it ferments to wine (Fleet 2003, 2008). Since little is known about the relative fitness of most WGD species in high-sugar environments like grape juice, it is unclear whether *S. cerevisiae*'s dominance in wine fermentations reflects certain attributes of the grape juice environment or the yeast species present within the community, and whether dominance in high-sugar environments is a simple consequence of the fermentative lifestyle or involves the acquisition of additional traits.

The objectives of this study were to determine when the ability to dominate high-sugar environments evolved in the yeast lineage and to identify traits that confer *S. cerevisiae* with a growth advantage in these environments. To infer when dominance arose and lessen the impact of any potential strain or species outliers, we examined a taxonomically diverse sample of 18 different yeast species spanning the WGD and the evolution of the fermentative lifestyle (Figure 1). Given that the evolution of the fermentative lifestyle spanned the WGD (Hagman et al. 2013), we included non-WGD

species that produce small amounts of ethanol (*Lachancea* and *Torulaspora* species) and WGD species that exhibit intermediate levels of fermentation (*Vanderwaltozyma* and *Tetrapisispora* species). To identify when dominance arose we directly competed these species with one another and found that dominance of high-sugar environments evolved much more recently than the evolution of the fermentative lifestyle. To identify traits involved in dominance we compared species' intrinsic growth rates under a variety of conditions and found that both ethanol and the type of high-sugar environment influence fitness.

## Material and Methods

### Yeast strains

A total of 20 yeast strains representing 18 non-WGD and WGD species were used for our experiments (Table S1 and Figure 1). We chose a *S. cerevisiae* strain isolated from oak (YPS163) to represent *S. cerevisiae* (Sniegowski et al. 2002). As a control for population variation within *S. cerevisiae*, we also included I14, a *S. cerevisiae* strain isolated from a vineyard in Italy (Fay and Benavides 2005) and BJ20, a *S. cerevisiae* strain isolated from a tree in China (Wang et al. 2012).

### Growth media

The primary assay media used were two high-sugar environments: Chardonnay grape juice (Vintners Reserve, Winexpert Inc., Port Coquitlam, B.C., Canada), hereafter referred to as “Grape”, and high-sugar rich medium (10 g/l yeast extract, 20 g/l peptone, 120 g/l dextrose), hereafter referred to as “HS”. We chose HS to reflect the glucose concentration typical of the grape juice environment, ~ 120 g/l (Rodicio and Heinisch 2009). Low-pH HS was made by adjusting the pH of HS from 6.7 to 3.7, the pH of our Grape medium, using tartaric acid, the predominant acid present in grape juice (Radler 1993). The media used to test for nutrient limitations in Grape included Grape with one of five nutrient supplements: YP (10 g/l yeast extract, 20 g/l peptone), CM (1.3 g/l synthetic complete with amino acids, 1.7 g/l yeast nitrogen base, and 5 g/l ammonium sulfate), AA (1.3 g/l complete amino acids), NB (1.7 g/l yeast nitrogen base), or AS (5 g/l ammonium sulfate). Assay media to test the ethanol tolerance of each yeast species was YPD (10 g/l yeast extract, 20 g/l peptone, 20 g/l dextrose) with ethanol concentrations ranging from 0-10%. Assay media to identify unknown inhibitor compounds produced by *S. cerevisiae* during growth was YPD made using supernatant from 16 other species (Table S1) grown in mono-culture and co-culture with *S. cerevisiae*. We chose YPD with 2% dextrose for ethanol tolerance and supernatant assays because ethanol produced during growth by fermenting species should not attain inhibitory concentrations.

## Competition experiments

*Growth conditions* – To assess the relative growth of non-WGD and WGD yeast species in high-sugar environments, we performed two competition experiments in which we measured the abundance of representative strains of multiple species relative to a focal species strain of *S. cerevisiae* or *S. paradoxus* after growth in co-culture. In the first competition experiment (Competition 1), we measured the abundances of six non-WGD and seven WGD species (Table S1) relative to a single *S. cerevisiae* strain (YPS163). As controls, we assessed the ability of the conspecific strain, I14, to grow relative to our reference *S. cerevisiae* strain, and grew each species in mono-culture. Competitions were initiated at approximately  $10^3$  cells of each species per ml of Grape and HS media. One ml cultures were grown in 2 ml 96-well plates that were covered with breathable film and incubated at 30°C with shaking at 400 rpm for 48 hours. To assess the effects of strain and temperature on the relative growth of WGD species in high-sugar environments, we measured the abundance of five WGD species relative to three *S. cerevisiae* strains (YPS163, I14, and BJ20) and a single strain of *S. paradoxus* (YPS152) following co-culture (Competition 2). Cultures were prepared and grown as in Competition 1, except that replicates of each culture were grown at 30°C and 22°C.

*Sampling* – For both competition experiments, samples were taken at the beginning and the end of the experiment and frozen at -20°C for later use. For mono-cultures in Competition 1, cells from *S. cerevisiae* mono-culture were mixed in equal volume with cells from each of the other species' mono-cultures at 48 hours and then frozen.



*DNA extraction* – DNA for Competition 1 was extracted from each sample using a protocol modified from Hoffman (2002) that included adding approximately 200 µl of 0.5 mm-diameter glass beads (BioSpec Products, Bartlesville, OK) to each sample and lysing cells in a bead beater (BioSpec Products) on high for 5 minutes at room temperature. For samples grown in Grape, DNA was also column purified to remove an unknown inhibitor of PCR amplification. DNA for Competition 2 was extracted using the ZR-96 Fungal/Bacterial DNA Kit (Zymo Research, Organge, CA).

*Pyrosequencing* – To quantify the abundance of *S. cerevisiae* relative to each competitor species in Competition 1, we pyrosequenced species-specific single nucleotide variants (SNVs). Previous studies have shown that pyrosequencing can accurately quantify the frequency of single nucleotide variants in pooled DNA samples (Lavebratt and Sengul 2006). To design pyrosequencing primers, we generated pair-wise sequence alignments of *ACT1* or *CYT1* between *S. cerevisiae* and each of the other species and identified at least one SNV for each pair and designed corresponding primer sets that included (1) forward and reverse primers for PCR and (2) a pyrosequencing primer (Table S2). Pyrosequencing was carried out using a PyroMark Q96 MD Automated pyrosequencer (Qiagen, Valencia, CA) following the protocol described by King and Scott-horton (2007) and the manufacturer's directions.

To calibrate each primer set, DNA from samples containing known ratios of cells from *S. cerevisiae* and each of the other species were also pyrosequenced and used to establish standard curves using linear and polynomial regression (Figure S1). For two species (*Nakaseomyces bacillisporus* and *Tetrapisispora blattae*), we were not able to

design sets of primers, and for three species (*Kazachstania lodderae*, *K. martiniae*, and *Kluyveromyces lactis*), we were not able to quantify abundance due to severely biased PCR or pyrosequencing identified by our control calibrations.

*High-throughput sequencing* – To quantify the abundance of each *S. cerevisiae* or *S. paradoxus* strain relative to each competitor species in Competition 2, we used high-throughput sequencing due to lower cost, larger sample capacity and a change in the availability of pyrosequencing. The internal transcribed sequence (ITS1) between the 5.8S and 18S ribosomal genes was amplified using 24 barcoded primers (Bokulich et al. 2012). Samples were further multiplexed using 18 indexed adaptors (Table S3). Following quantification and pooling at equal concentrations, the sample library was sequenced on a single 1x250 bp run of an Illumina MiSeq. Sample sequences were demultiplexed allowing a single mismatch to each barcode or index followed by adaptor trimming and clipping of any low quality bases using ea-utils (Aronesty 2011). Species' counts in each sample were obtained by blastall (v2.2.25) against 287,101 sequences from culturable species in the UNITE+INSD database (Kõljalg et al. 2013). Out of 11.6 million raw reads, 8.0 million were included in the analysis with a median of 4,346 species tags across 578 samples.

ITS1 species counts were calibrated using DNA from samples with known ratios of cells from *S. cerevisiae* or *S. paradoxus* and each of the competitor species. Standard curves were generated using linear regression (Figure S2). For three species with non-

linear calibration curves, *Naumovozyma castellii*, *K. lodderae* and *Candida glabrata*, we used a modified regression:

$$y = bx/(1+x(b-1))$$

where  $b$  is a bias parameter,  $x$  is the observed frequency and  $y$  is the known frequency (Moskalev et al. 2011). For two species with particularly strong bias, *N. castellii* and *K. lodderae*, we also generated calibration curves for *ACT1* PCR fragments. *ACT1* PCR fragments showed a weaker bias, and so we used these fragments for all competitions between *S. cerevisiae* and either *N. castellii* or *K. lodderae*.

*Assessing dominance* – To determine the abundance of *S. cerevisiae* or *S. paradoxus* relative to each species, we adjusted the percentage of species-specific SNVs sequenced during pyrosequencing (Competition 1) or the number of species-specific counts from high-throughout sequencing (Competition 2) using our standard curves. If values were negative after this adjustment, we conservatively adjusted them to 0.005. To calculate the relative fitness of each competitor species, we used:

$$\ln(C_t/R_t) - \ln(C_0/R_0) = t\ln(w_c/w_r)$$

where  $C_t$  and  $R_t$  are the frequencies of the competitor and reference at generation  $t$  and  $w$  is fitness. For all competitions we assumed  $t = 14$  based on changes in cell density.

To identify significant growth differences between species, we either used a one-tailed paired Welch's  $t$  test (Competition 1), or a mixed effect model with random effect for strain and a fixed effect for the competitor's fitness (Competition 2). To correct for multiple comparisons, we used the method of Benjamini and Hochberg (1995) and a false discovery rate (FDR) cutoff of less than 0.01 for Competition 1 and 0.05 for Competition 2, since fewer species were competed in Competition 2.

## Intrinsic growth rate experiments

*Growth assays* – Cultures were inoculated at an optical density (OD) at 600 nm of approximately 0.25 in 1 ml of growth medium and were grown in 2 ml 96-well plates that were covered with breathable film and incubated at 30°C with shaking at 400 rpm for up to 48 hours. Cell density was measured by OD at 620 nm at 0, 4, 8, 12, 18, 24, 36, and 48 hours using an iEMS microplate reader (Thermo Lab Systems, Helsinki, Finland).

*Analysis* – The intrinsic growth rate ( $r$ ) of each species was calculated for each time interval using the equation:

$$N_t = N_0 e^{rt}$$

where  $N_t$  is final cell density,  $N_0$  is initial cell density and  $t$  is time in hours. The average intrinsic growth rate of each species across all sampling intervals for a given medium was then used to evaluate the effect of a treatment (*i.e.*, low-pH or a nutrient supplement) on

the growth of each species, ( $\Delta r_{Treatment} = r_{Treatment} - r_{Control}$ ), or the effect of the species in a given environment ( $\Delta r_{Species} = r_{non-S. cerevisiae} - r_{S. cerevisiae}$ ). While the average growth rate does not distinguish between differences in lag phase, exponential growth rate and carrying capacity, we used it because it had a smaller error among replicates.

For two sets of experiments, we only used OD up to and including 24 hours in our analysis: ethanol tolerance experiments and supernatant experiments. For ethanol tolerance experiments we observed flocculation that increased the variability of OD measurements beginning at 36 hours. For inhibitor compound experiments we observed that un-inoculated control samples registered noticeable effects on OD measurements beginning at 36 hours.

Ethanol tolerance among species was measured by the ethanol concentration that inhibited growth by 50% ( $IC_{50}$ ).  $IC_{50}$  estimates were obtained by fitting dose response curves using a three-parameter Weibull function in R (R Development Core Team 2013) using the ‘drc’ package (Ritz and Streibig 2005). Statistical comparisons between the estimated  $IC_{50}$  for *S. cerevisiae* and each species were made using the ‘comped’ function (Ritz and Streibig 2005; R Development Core Team 2013) followed by the Altman and Bland method to calculate *P* values from confidence intervals (Altman and Bland 2011). To correct for multiple comparisons, we used the method of Benjamini and Hochberg (1995) and a FDR cutoff of less than 0.01 for significance.

## Results

Ecological dominance of yeast species in grape juice evolved more recently than the fermentative lifestyle

279

280           To determine when ecological dominance of high-sugar environments evolved,  
281 we grew representative strains of multiple non-WGD and WGD yeast species in two  
282 high-sugar environments: Chardonnay grape juice (Grape) and a high-sugar rich medium  
283 (HS). If dominance in high-sugar environments evolved along with the evolution of  
284 fermentation in the presence of oxygen, we expect *S. cerevisiae* will consistently exhibit  
285 higher relative fitness than all non-WGD species but not WGD species in both high-sugar  
286 environments. Grape was chosen to represent a natural high-sugar environment, and HS  
287 was chosen to replicate the sugar concentration typical of the grape juice environment  
288 while limiting the potential influence of nutrient content and low-pH. Since the ability to  
289 dominate is inherently a relative trait, we assessed the growth of each non-WGD and  
290 WGD species relative to a representative *S. cerevisiae* strain isolated from an oak tree  
291 (YPS163) using co-cultures. As a control, we also grew a *S. cerevisiae* strain isolated  
292 from a vineyard (I14) in co-culture with our reference *S. cerevisiae* strain. If the relative  
293 abundance of *S. cerevisiae* was significantly higher at the end compared to the start of the  
294 experiment, indicating a higher relative fitness, it was considered “dominant”.

295           We find that *S. cerevisiae* dominates nearly all non-WGD and WGD yeast species  
296 in Grape and HS co-cultures (Figure 2A and 2B). In both Grape and HS, *S. cerevisiae*  
297 increased in abundance relative to 10/12 yeast species (FDR < 0.01, Table S4). In the  
298 majority of these co-cultures, *S. cerevisiae* was greater than 90% of the population at 48  
299 hours. Notably, *S. cerevisiae* remained a significant proportion of the population even  
300 when it did not dominate. These data show that *S. cerevisiae* is able to dominate in

multiple high-sugar environments, and they suggest that the ability to dominate high-sugar environments arose recently in yeast evolution.

In support of a more recent evolution of ecological success in high-sugar environments, *S. paradoxus* is the only species that persists along with *S. cerevisiae* in Grape and HS co-cultures. Two other strains, *S. cerevisiae* (I14) and *C. glabrata*, also competed well with our *S. cerevisiae* reference. However, their persistence depended upon the environment: *S. cerevisiae* dominated *C. glabrata* in Grape (FDR = 0.0072) but not in HS, whereas it dominated I14 in HS (FDR = 0.0010) but not in Grape. Thus, *S. paradoxus* was the only species able to compete well with *S. cerevisiae* in both high-sugar environments.

One explanation for *S. cerevisiae*'s dominance in our Grape and HS co-cultures is that it has a greater carrying capacity than other species in these environments, even when they are grown individually. As a control for our co-culture experiments, we also measured the density of each species grown in mono-culture by mixing it with a *S. cerevisiae* mono-culture after 48 hours and quantifying the proportion of each species.

*S. cerevisiae* has a carrying capacity similar to the majority of yeast species in Grape and HS (Figure 2C and 2D). In Grape, the abundance of *S. cerevisiae* was significantly greater than only 2/12 species after 48 hours of mono-culture (Figure 2C, FDR < 0.01). Species that obtained significantly lower carrying capacities included the non-WGD species *Hanseniaspora vineae* and the WGD species *Vanderwaltozyma polyspora*, which were 1% and 3% of *S. cerevisiae*'s abundance after 48 hours in mono-culture. The relative population size of *S. cerevisiae* was also not significantly greater

than 12/12 species tested in HS. These data imply that *S. cerevisiae*'s dominance in Grape and HS co-cultures is not due to differences between species in their individual carrying capacities.

Dominance of high-sugar environments appears to be a trait shared by *S. cerevisiae* and *S. paradoxus*. However, we only used one representative strain of *S. cerevisiae* and did not compete *S. paradoxus* with other species. To test whether *S. cerevisiae*'s dominance is a property of the strain used or the species we repeated a subset of the Grape and HS competitions using two additional strains of *S. cerevisiae*: a soil isolate (I14) from Italy that is closely related to other European strains (Fay and Benavides 2005) and a tree isolate from China that is diverged from both the European strain and our reference strain YPS163 from North America (Wang et al. 2012). The fitness of the three *S. cerevisiae* strains together in relation to each competitor species indicates that *S. cerevisiae*: dominates *S. mikatae*, *S. uvarum*, *N. castellii* and *K. lodderae* in both Grape and HS, dominates *C. glabrata* in Grape but not HS, and has no fitness differences in comparison to *S. paradoxus* (FDR < 0.05, Figure 3A and 3B). These results confirm our previous results based on a single *S. cerevisiae* reference strain and add *K. lodderae* to the list of species dominated by *S. cerevisiae*.

Using *S. paradoxus* as the reference species we find that *S. paradoxus* dominates the same yeast species as *S. cerevisiae* in Grape (Figure 3A). In HS, *S. paradoxus* dominates fewer species than *S. cerevisiae*; it does not dominate *S. mikatae* and *K. lodderae* (Figure 3B). Thus, the results of our competition experiments with *S. paradoxus* show that dominance in Grape is shared by both *S. cerevisiae* and *S.*



*paradoxus* but that the ability of *S. paradoxus* to dominate in HS is not as strong as that of *S. cerevisiae*.

Temperature affects ecological dominance of certain yeast species in high-sugar environments

The *Saccharomyces* species have differentiated in both their optimal and maximum growth temperature (Belloch et al. 2008; Gonçalves et al. 2011; Salvadó et al. 2011b; Kurtzman et al. 2011). Because *S. cerevisiae*'s optimal growth temperature (32°C), is higher than that of *S. paradoxus* (30°C), *S. mikatae* (29°C) and *S. uvarum* (26°C) (Salvadó et al. 2011b), its dominance of high-sugar environments could depend on the high temperature (30°C) of our initial competition experiment. To examine this possibility, we competed a subset of species at a lower temperature (22°C).

Similar to the results of our competition experiments performed at high temperature, at 22°C both *S. cerevisiae* and *S. paradoxus* dominated *S. uvarum* and *N. castellii* in Grape and HS, and dominated *C. glabrata* in Grape but not HS (Figure 3C and 3D). However, at the lower temperature neither *S. cerevisiae* nor *S. paradoxus* dominated *S. mikatae* or *K. lodderae* in Grape or HS, and *K. lodderae* dominated *S. cerevisiae* and *S. paradoxus* in HS. Thus, ecological dominance of certain yeast species in high-sugar environments depends on temperature, which implicates the evolution of thermal tolerance among the *Saccharomyces* species in the evolution of ecological dominance.

*S. cerevisiae* has a distinct competitive advantage in grape juice

Our finding that many WGD yeast species compete poorly with *S. cerevisiae* in high-sugar environments suggests that the fermentative lifestyle is not sufficient to confer ecological success in these environments. Since the majority of the species we tested are capable of achieving similar carrying capacities to *S. cerevisiae* in these environments when grown individually, *S. cerevisiae*'s dominance in our Grape and HS co-cultures must be related to either differences in intrinsic growth rates or interference competition. To investigate these two modes of ecological dominance, we measured the intrinsic growth rate of each species in mono-culture. If *S. cerevisiae* does not exhibit a greater intrinsic growth rate than other species, then its ability to dominate in these environments can be attributed to interference competition.

*S. cerevisiae* has a greater intrinsic growth rate than nearly all yeast species in the grape juice environment (Figure 4). Compared to *S. cerevisiae*, 16/17 species exhibited a significantly lower intrinsic growth rate in Grape (FDR < 0.01, Table S5). The one notable exception to this pattern was *S. paradoxus*, which had a lower growth rate but did not meet our cutoff for significance (FDR = 0.028). In stark contrast to our finding in Grape, when we compared the intrinsic growth rate of *S. cerevisiae* to the intrinsic growth rate of each of the other species in HS, we did not observe any significant difference for 17/17 species (Figure 4B). These results suggest different or multiple mechanisms contribute to the dominance of *S. cerevisiae* in high-sugar environments. Furthermore, they support the recent evolution of traits required for ecological success in

the grape juice environment. In the following sections we examine factors that may contribute to the dominance of *S. cerevisiae* in both HS and Grape.

Evolution of ethanol tolerance and its potential role in interference competition

*S. cerevisiae*'s ability to produce and tolerate ethanol is one way in which it may dominate other species in high-sugar environments. Although previous studies showed that *S. cerevisiae* tolerates higher ethanol concentrations than many yeast species, they only included 4/17 of the species used in this study (Pina et al. 2004; Belloch et al. 2008; Arroyo-López et al. 2010; Salvadó et al. 2011a). To examine the potential impact of ethanol on the growth of each species, we measured the intrinsic growth rate of each species in YPD supplemented with ethanol at concentrations ranging from 0-10% and calculated the ethanol concentration that inhibited growth rate by 50% (IC<sub>50</sub>) for each species by fitting dose-response curves to the growth rate (see Materials and Methods).

*S. cerevisiae* had an IC<sub>50</sub> greater than 15/17 yeast species (Figure 5 and Table S6). The two exceptions to this pattern were *S. cerevisiae*'s closest relative, *S. paradoxus* (FDR = 0.0502) and *C. glabrata* (FDR = 0.0320). *C. glabrata* grew as well as *S. cerevisiae* at moderate ethanol concentrations, and it grew better than *S. cerevisiae* at low ethanol concentrations (Figure S3 and Table S6). However, most of *S. cerevisiae*'s growth advantage occurred at ethanol concentrations at or above 4% (Figure S3 and Table S6). Thus, while all species tolerate low concentrations of ethanol (< 4%), *S.*

*cerevisiae* exhibits a growth advantage compared to most species at high-ethanol concentrations.

No evidence for interference competition mediated by other toxic metabolites

Previous studies found that *S. cerevisiae* produced toxic metabolites other than ethanol that inhibit the growth of competitor species (van Vuuren and Jacobs 1992; Magliani et al. 1997; Musmanno et al. 1999; Pérez-Nevado et al. 2006; Albergaria et al. 2010; Rodríguez-Cousiño et al. 2011; Branco et al. 2014). However, other studies either did not find any evidence that *S. cerevisiae* produced an inhibitory compound (Torija et al. 2001; Nissen et al. 2003; Arroyo-López et al. 2011) or found that the ability to produce killer toxins varied among *S. cerevisiae* strains (Gutiérrez et al. 2001; Sangorrín et al. 2007; Maqueda et al. 2012). To determine whether the *S. cerevisiae* strain we used during our assays produces an inhibitor compound, we grew each species in the supernatant obtained from YPD mono-cultures and co-cultures with *S. cerevisiae*. We chose YPD, which contains 2% dextrose, because ethanol concentrations should not attain inhibitory concentrations during growth. In no instance did the supernatant inhibit the subsequent growth of each species (Figure S4 and Table S7).

Low-pH and nutrient limitations contribute to *S. cerevisiae*'s intrinsic growth rate advantage in grape juice

Grape juice differs from high-sugar rich medium in that it has a lower pH (pH = 3.7 vs pH = 6.7) and reduced levels of nutrients, most notably yeast assimilable nitrogen (Henschke and Jiranek 1993). To determine whether *S. cerevisiae*'s higher intrinsic growth rate in grape juice is related to pH or nutrient deficiencies we measured the effects of altered pH of HS and nutrient content of Grape for each species.

To test the effect of pH on the intrinsic growth rate of each species, we grew each species in low-pH HS, HS adjusted to the same acidity level as our Grape medium. As a control, we compared each species' growth in low-pH HS to its growth in HS. If *S. cerevisiae*'s intrinsic growth rate is greater than other species in Grape due to low-pH, then *S. cerevisiae* should also exhibit a higher intrinsic growth rate than other species in low-pH HS.

*S. cerevisiae* has an intrinsic growth rate advantage in low-pH HS (Figure 6). When grown in low-pH HS, 4/18 species exhibited a significantly lower intrinsic growth rate when compared to growth in HS (Figure 6A and Table S8). Notably, only three species, including *S. cerevisiae* were not affected by low-pH at a nominal level of significance ( $P < 0.05$ ) compared to an FDR cutoff of 0.01. Additionally, when we compared the intrinsic growth rate of *S. cerevisiae* in low-pH HS to each of the other species in this environment, *S. cerevisiae*'s intrinsic growth rate was greater than 8/17 species (Figure 6B), compared to 0/17 species observed in HS (Figure 4B).

To test the effect of nutrient deficiency on the intrinsic growth rate of each species, we grew each species in Grape supplemented with one of several different nutrient sources that varied in complexity: YP, CM, NB, AA, and AS. YP is the rich

nutritive base of the HS environment, CM contains vitamins and minerals, amino acids, and a single good nitrogen source, and NB, AA, and AS are the vitamins and minerals, amino acids, and nitrogen source (ammonium sulfate) components of CM, respectively. As a control, we compared each species' growth in Grape with a nutrient supplement to its growth in Grape without the nutrient supplement. If nutrient limitations contribute to intrinsic growth rate differences between species, then nutrient supplements in Grape should increase each species' growth rate and reduce or eliminate intrinsic growth rate differences between species.

Most yeast species are nutrient limited in grape juice. Of the 18 species we assayed, 12 exhibited a significant increase in intrinsic growth rate with the addition of one or more nutrient supplements, including *S. cerevisiae* (Figure 7, Figure S5 A-D, and Table S9). However, which nutrients elicited a significant increase in growth varied by species. For example, *S. uvarum* was positively affected by the addition of YP and NB, whereas *C. glabrata* was positively affected by YP, CM and AA. Overall, YP positively affected the intrinsic growth rate of the most species (11), followed by NB (7), CM (6), and AA (3). However, none of the species we assayed grew significantly better with the addition of AS, a good nitrogen source.

Nutrient supplements eliminate the intrinsic growth rate differences between *S. cerevisiae* and nearly all other yeast species. Of the 17 species that grew significantly slower than *S. cerevisiae* in Grape (Figure 4A), only two species, *N. castellii* and *V. polyspora*, grow significantly slower than *S. cerevisiae* in spite of all of the nutrient supplements used in our experiments (Table S9). Overall, Grape supplemented with CM

had the fewest number of species that still grew significantly slower than *S. cerevisiae* (4), followed by Grape supplemented with AS (7), NB (12), YP (14), and AA (16).

## Discussion

The diversion of more sugar to fermentation than respiration in the presence of oxygen, i.e. the fermentative lifestyle, provides many yeast species the opportunity to exploit novel environments and ecological strategies. One such species, *S. cerevisiae*, consistently dominates wine fermentations and has become widely used to ferment beer, bread and wine. In this study, we investigated when *S. cerevisiae*'s ability to dominate high-sugar environments evolved and whether its dominance is a simple consequence of the fermentative lifestyle. We find that dominance evolved much more recently than the evolution of the fermentative lifestyle and for certain species depends on the temperature and growth medium. Our results suggest that *S. cerevisiae*'s frequently observed dominance of grape juice fermentations is mediated by the evolution of multiple traits that build on an ancient change in metabolism.

## Evolution of dominance in relation to the fermentative lifestyle

Our study indicates that dominance in high-sugar environments evolved much more recently than the WGD and the transition to the fermentative lifestyle (Hagman et al. 2013). While previous studies showed that *S. cerevisiae* dominates multiple other non-

WGD species (Holm Hansen et al. 2001; Fleet 2003, 2008; Pérez-Nevado et al. 2006; Goddard 2008), our findings demonstrate that *S. cerevisiae* and its closest relative, *S. paradoxus* also dominate most other WGD yeast species in high-sugar environments and that the temperature and growth medium are also important. The ability of *S. cerevisiae* and *S. paradoxus* to dominate representatives of multiple taxonomically diverse species suggests that dominance arose quite recently. However, the change in dominance relationships across environments implies that: i) multiple traits underlie dominance, ii) these traits have changed on lineages other than that leading to the ancestor of *S. cerevisiae* and *S. paradoxus*, and iii) dominance cannot be ascribed to a single lineage.

Multiple, distantly-related WGD lineages grow well in nutrient rich, high-sugar environments, but few species grow as well as *S. cerevisiae* in grape juice. While *S. cerevisiae* and *S. paradoxus* dominate most WGD yeast species in HS medium, they do not dominate *C. glabrata* in this environment, and depending upon the temperature, they also lose some or all of their competitive advantage over *S. mikatae* and *K. lodderae*. Remarkably, *K. lodderae*'s higher relative fitness in HS compared to Grape contributes to its unique ability to dominate *S. cerevisiae* and *S. paradoxus* in HS at low-temperature. One explanation for the exceptional growth observed for these species is that the ability to compete in nutrient rich, high-sugar environment evolved independently along the lineages that gave rise to *K. lodderae*, *C. glabrata*, and the *Saccharomyces* species. Alternatively, the ability to compete well in nutrient rich, high-sugar environments may have evolved early during the transition to the fermentative lifestyle, followed by multiple, independent losses. However, our findings suggest that the more parsimonious



explanation is that the ability to dominate evolved much more recently than the transition to the fermentative lifestyle.

Evolution of temperature preferences affects the dominance of certain species. Among the *Saccharomyces* species, *S. cerevisiae*, *S. paradoxus* and *S. mikatae* can grow at 37°C, whereas *S. arboricolus*, *S. uvarum* and *S. kudriavzevii* cannot and the latter two are considered cryophilic (Belloch et al. 2008; Gonçalves et al. 2011; Salvadó et al. 2011b). Outside the *Saccharomyces* species, *K. lodderae*, *K. martiniae*, *T. blattae*, *L. waltii* and *H. vineae* cannot grow at 37°C (Kurtzman et al. 2011), indicating that growth at high temperature has been gained and/or lost multiple times. Given the species tree (Figure 1), we attribute *S. cerevisiae*'s and *S. paradoxus*' dominance of *S. mikatae* at 30°C but not 22°C to evolution of thermal tolerance. Similarly, *S. cerevisiae*'s dominance of *K. lodderae* in Grape at 30°C but not 22°C may also depend on the evolution of thermal tolerance. Although we did not specifically assay dominance below 22°C, the outcome of competitions performed at even cooler temperatures may change. *S. uvarum* dominates some wines at low temperatures (Torriani et al. 1999; Naumov et al. 2000; Sipiczka et al. 2001; Rementeria et al. 2003; Demuyter et al. 2004), and *S. kudriavzevii* does not dominate but competes better with *S. cerevisiae* at low temperatures (Arroyo-López et al. 2011). However, *S. cerevisiae*'s dominance of *S. uvarum* may not be a simple consequence of thermal tolerance; *S. uvarum*'s growth rate in grape juice increased with supplementation of rich medium (YP) to a rate equivalent to that of *S. cerevisiae*. Furthermore, we did not observe a significant intrinsic growth rate difference between these species in high-sugar rich medium when grown at 30°C (Figure 4).

The thermal differentiation of *Saccharomyces* species raises the possibility that the ability to dominate high-sugar environments evolved prior to their differentiation. Dominance of high-sugar environments may have evolved progressively such that WGD yeast species can outcompete non-WGD yeast species even though they lose to *S. cerevisiae*. However, more pair-wise competitions between other non-Saccharomyces WGD species and non-WGD species are needed to test that hypothesis. While the evolution of dominance cannot be pinned to any particular lineage, we see no clear progression to higher ethanol tolerance among WGD yeast species or evidence for higher intrinsic growth rate in grape juice outside of the *Saccharomyces* species. Thus, in addition to thermal differentiation, other traits likely to contribute to dominance evolved among the *Saccharomyces* species.

One limitation of our ability to make inferences about the evolution of dominance and how the environment influences it is that most species were only represented by a single strain. While the fitness of three diverse strains of *S. cerevisiae* are generally quite similar to one another and to *S. paradoxus*, competitor strains may not always be representative of the species. This possibility places some limits on the interpretation of dominance relationships specific to a single species, e.g. *C. glabrata* and *K. lodderae*, but is unlikely to explain overall patterns of dominance.

Multiple mechanisms of ecological dominance

*S. cerevisiae*'s dominance of high-sugar environments cannot be explained by a single mechanism. In addition to thermal tolerance discussed above, we also find evidence for ethanol tolerance and a high intrinsic growth rate in grape juice. Interference competition through the production of ethanol provides one explanation for *S. cerevisiae*'s dominance of high-sugar rich medium. Consistent with previous studies (Pina et al. 2004; Belloch et al. 2008; Arroyo-López et al. 2010; Salvadó et al. 2011a), we found that *S. cerevisiae* exhibits greater ethanol tolerance than most species. In support of the role of ethanol tolerance in dominance, *S. paradoxus* and *C. glabrata* exhibited ethanol tolerance similar to *S. cerevisiae* and were the only two species that were not dominated by *S. cerevisiae* in high-sugar rich medium at high temperature.

However, previous studies showed that oxygen, cell density and an inhibitory peptide affect *S. cerevisiae*'s dominance of various non-WGD species (Holm Hansen et al. 2001; Nissen et al. 2003, 2004; Pérez-Nevado et al. 2006; Albergaria et al. 2010; Branco et al. 2014). These studies excluded the effects of ethanol because non-WGD species initiated cell death by some other mechanism before ethanol reached inhibitory concentrations. While we only measured competitions with two of the species used in earlier studies, *T. delbrueckii* and *L. thermotolerans*, we cannot exclude the possibility that these species were dominated for reasons other than ethanol inhibition. One difference between our experiments and those of prior studies is that they were carried out with low or no agitation, whereas we performed our competitions under high agitation (400 rpm). Agitation is expected to increase dissolved oxygen and might

eliminate cell density and confinement effects (Nissen et al. 2003, 2004; Arneborg et al. 2005).

Multiple lines of evidence suggest that *S. cerevisiae*'s dominance in grape juice is influenced by its high intrinsic growth rate in this environment. *S. cerevisiae* exhibited the highest rate of growth in grape juice, significantly higher than all species except *S. paradoxus*. The absence of any difference in growth rate in high-sugar rich medium implies that *S. cerevisiae*'s intrinsic growth advantage in grape juice is specific to grape juice or similar environments. Furthermore, lowering the pH of high-sugar rich medium did not affect *S. cerevisiae* but affected the growth of other species, and supplementation of nutrients to grape juice increased the growth of many species but had little to no effect on *S. cerevisiae*. Notably, *S. uvarum*, *C. glabrata* and *H. vineae* grew as well as *S. cerevisiae* in low-pH medium and in grape juice supplemented with rich nutrients (YP), indicating that low nutrients alone may explain their slow growth in grape juice.

The relative importance of temperature, intrinsic growth rate and ethanol inhibition to *S. cerevisiae*'s dominance of grape juice is uncertain since their effects are difficult to disentangle from one another. In support of temperature, fermentation is exothermic and can increase the temperature of wine must by as much as 10°C (Boulton 1979; Goddard 2008). However, we found that nutrient supplementation increased most species' intrinsic growth rate in grape juice at 30°C. Ethanol inhibition is not likely to be important until the later stages of fermentation because most species were not significantly inhibited by ethanol concentrations below 5%, similar to previous reports

(Goddard 2008; Salvadó et al. 2011a). As such, we favor intrinsic growth rate in grape juice as a driver of dominance as it likely acts earlier and throughout the competition.

Interactions between factors may also contribute to *S. cerevisiae*'s dominance. Ethanol and high-temperature act synergistically to decrease growth due to their overlapping effects on lipid membrane integrity (Piper 1995). Lipid membrane integrity importantly affects proton (H<sup>+</sup>) transport across the cell membrane, and the combined effects of ethanol and high-temperature increase the lipid membrane's H<sup>+</sup> permeability (Madeira et al. 2010). Increased H<sup>+</sup> permeability can also result in reduced intracellular pH, particularly in acidic environments such as grape juice. While we did not measure any interaction effects, Goddard (2008) found interactions between the effects of temperature, ethanol and media, including grape juice, on the growth rate of *Saccharomyces* versus non-*Saccharomyces* species.

## Ecology of high-sugar environments

The fermentative lifestyle is hypothesized to coincide with the evolution of flowering plants due to the abundance of diverse high-sugar environments (Wolfe and Shields 1997; Piskur and Langkjaer 2004; Thomson et al. 2005; Conant and Wolfe 2007). While the ecology of fermentative species is not well known, many have been isolated from insects and may be transported to high-sugar environments (Kurtzman et al. 2011). However, the recent evolution of traits that contribute to *S. cerevisiae*'s dominance of high-sugar environments is perplexing. Although both *S. cerevisiae* and *S. paradoxus* can

be found in vineyards (Redzepović et al. 2002; Hyma and Fay 2013), these and other *Saccharomyces* species are commonly associated with tree bark, soil and decaying leaves (Naumov et al. 1998; Sniegowski et al. 2002; Zhang et al. 2010; Wang et al. 2012; Hyma and Fay 2013). Given their abundance in arboreal habitats, it seems unlikely that their exceptional fitness in grape juice is due to adaptation to grape juice fermentations and thereby provides evidence for exaptation (Larson et al. 2013). One way in which these species may have become adapted to high-sugar but low-nutrient environments is through associations with insect-honeydew, which is high in sugar (>10 g/l) but low in amino acids (Douglas 1993; Fischer and Shingleton 2001; Fischer et al. 2002). While a variety of insects and other animals exploit honeydew for its sugar resources (Beggs and Wardle 2006), and a recent investigation revealed that many taxonomically diverse fungi compete for honeydew (Dhami et al. 2013), no *Saccharomyces* species were found associated with aphid honeydew from Black Beach trees in New Zealand (Serjeant et al. 2008). It is also possible that *S. cerevisiae* is not adapted to a particular niche but is a generalist that happens to be particularly fit in high-sugar environments (Goddard and Greig 2015).

In addition to dominance relationships we studied, a variety of other factors may contribute to *S. cerevisiae*'s observed dominance of grape juice fermentations in vineyards. Many WGD species may not be present within vineyard environments. Of the non-*Saccharomyces* species used in this study, only the non-WGD species *Z. rouxii*, *T. delbrueckii*, *L. thermotolerans*, and *H. vineae* have been reportedly isolated from grapes or wine must (Kurtzman et al. 2011). Furthermore, sulfites are frequently added to wine

must, and wine strains of *S. cerevisiae* are known to exhibit higher levels of sulfite resistance than non-wine strains (Pérez-Ortín et al. 2002; Yuasa et al. 2004). Interspecific differences in sulfite resistance (Engle and Fay 2012), copper resistance (Warringer et al. 2011) and other environmental conditions that we did not examine may thus contribute to *S. cerevisiae*'s observed dominance of wine fermentations. Although we find *S. paradoxus* to be competitive with *S. cerevisiae* in controlled laboratory settings, it has been reported to be the dominant yeast species in only a few fermentations (Redzepović et al. 2002; Valero et al. 2007). Complicating such comparisons, however, is the possibility that *S. paradoxus* may not have always been distinguishable from *S. cerevisiae*, particularly in earlier studies of dominant yeast species from spontaneous wine fermentations.

## Acknowledgements

We thank members of the Fay lab for comments and suggestions. This work was supported by a National Institutes of Health training grant to KRW (HG000045) and research grant to JCF (GM080669).

## Literature Cited

669 Albergaria, H., D. Francisco, K. Gori, N. Arneborg, and F. Gírio. 2010. *Saccharomyces*  
670 *cerevisiae* CCM1 885 secretes peptides that inhibit the growth of some non-  
671 *Saccharomyces* wine-related strains. Appl. Microbiol. Biotechnol. 86:965–72.

672 Alfaro, M. E., C. D. Brock, B. L. Banbury, and P. C. Wainwright. 2009. Does  
673 evolutionary innovation in pharyngeal jaws lead to rapid lineage diversification in  
674 labrid fishes? BMC Evol. Biol. 9:255.

675 Altman, D. G., and J. M. Bland. 2011. How to obtain the P value from a confidence  
676 interval. BMJ 343:d2304–d2304.

677 Arneborg, N., H. Siegmund, G. H. Andersen, P. Nissen, V. R. Daria, P. J. Rodrigo, and  
678 J. Glückstad. 2005. Interactive optical trapping shows that confinement is a  
679 determinant of growth in a mixed yeast culture. FEMS Microbiol. Lett. 245:155–  
680 9.

681 Aronesty, E. 2011. ea-utils: Command-line tools for processing biological sequencing  
682 data. Expression Analysis, Durham, NC, <http://code.google.com/p/ea-utils>

683 Arroyo-López, F., L. Pérez-Través, A. Querol, and E. Barrio. 2011. Exclusion of  
684 *Saccharomyces kudriavzevii* from a wine model system mediated by  
685 *Saccharomyces cerevisiae*. Yeast 28:423–435.



686 Arroyo-López, F., Z. Salvadó, J. Tronchoni, J. M. Guillamón, E. Barrio, and A. Querol.  
687 2010. Susceptibility and resistance to ethanol in *Saccharomyces* strains isolated  
688 from wild and fermentative environments. *Yeast* 27:1005–1015.

689 Beggs, J. R., and D. A. Wardle. 2006. Keystone species: Competition for honeydew  
690 among exotic and indigenous species. Pp. 281-294 in R. Allen, and W. Lee, eds.  
691 Biological invasions in New Zealand. Springer, Berlin Heidelberg, Germany.

692 Belloch, C., S. Orlic, E. Barrio, and A. Querol. 2008. Fermentative stress adaptation of  
693 hybrids within the *Saccharomyces sensu stricto* complex. *Int. J. Food Microbiol.*  
694 122:188–195.

695 Benjamini, Y., and Y. Hochberg. 1995. Controlling the false discovery rate: a practical  
696 and powerful approach to multiple testing. *J. R. Stat. Soc. Ser. B* 57:289–300.

697 Bokulich, N. A., C. M. Lucy Joseph, G. Allen, A. K. Benson, and D. A. Mills. 2012.  
698 Next-generation sequencing reveals significant bacterial diversity of botrytized  
699 wine. *PLoS One* 7:e36357.

700 Bouchenak-Khelladi, Y., J. a Slingsby, G. A. Verboom, and W. J. Bond. 2014.  
701 Diversification of C<sub>4</sub> grasses (Poaceae) does not coincide with their ecological  
702 dominance. *Am. J. Bot.* 101:300–7.

703 Boulton, R. 1979. The heat transfer characteristics of wine fermentors. *Am. J. Enol.*  
704 *Vitic.* 30:152-156.

705 Branco, P., D. Francisco, C. Chambon, M. Hébraud, N. Arneborg, M. G. Almeida, J.  
706 Caldeira, and H. Albergaria. 2014. Identification of novel GAPDH-derived  
707 antimicrobial peptides secreted by *Saccharomyces cerevisiae* and involved in  
708 wine microbial interactions. Appl. Microbiol. Biotechnol. 98:843–53.

709 Conant, G. C., and K. H. Wolfe. 2007. Increased glycolytic flux as an outcome of whole-  
710 genome duplication in yeast. Mol. Syst. Biol. 3:1–12.

711 Demuyter, C., M. Lollier, J.-L. Legras, and C. Le Jeune. 2004. Predominance of  
712 *Saccharomyces uvarum* during spontaneous alcoholic fermentation, for three  
713 consecutive years, in an Alsatian winery. J. Appl. Microbiol. 97:1140–8.

714 Dhami, M. K., B. S. Weir, M. W. Taylor, and J. R. Beggs. 2013. Diverse honeydew-  
715 consuming fungal communities associated with scale insects. PLoS One  
716 8:e70316.

717 Douglas, A. E. 1993. The nutritional quality of phloem sap utilized by natural aphid  
718 populations. Ecol. Entomol. 18:31–38.

719 Edwards, E. J., C. P. Osborne, C. a E. Strömberg, S. a Smith, W. J. Bond, P.-A. Christin,  
720 A. B. Cousins, M. R. Duvall, D. L. Fox, R. P. Freckleton, O. Ghannoum, J.  
721 Hartwell, Y. Huang, C. M. Janis, J. E. Keeley, E. a Kellogg, A. K. Knapp, A. D.  
722 B. Leakey, D. M. Nelson, J. M. Saarela, R. F. Sage, O. E. Sala, N. Salamin, C. J.  
723 Still, and B. Tipple. 2010. The origins of C<sub>4</sub> grasslands: integrating evolutionary  
724 and ecosystem science. Science 328:587–91.

725 Engle, E. K., and J. C. Fay. 2012. Divergence of the yeast transcription factor *FZF1*  
726 affects sulfite resistance. *PLoS Genet.* 8:e1002763.

727 Fay, J. C., and J. A. Benavides. 2005. Evidence for domesticated and wild populations of  
728 *Saccharomyces cerevisiae*. *PLoS Genet.* 1:66-71.

729 Field, Y., Y. Fondufe-Mittendorf, I. K. Moore, P. Mieczkowski, N. Kaplan, Y. Lubling,  
730 J. D. Lieb, J. Widom, and E. Segal. 2009. Gene expression divergence in yeast is  
731 coupled to evolution of DNA-encoded nucleosome organization. *Nat. Genet.*  
732 41:438–445.

733 Fischer, M. K., and A. W. Shingleton. 2001. Host plant and ants influence the honeydew  
734 sugar composition of aphids. *Funct. Ecol.* 15:544–550.

735 Fischer, M. K., W. Völkl, R. Schopf, and K. H. Hoffmann. 2002. Age-specific patterns in  
736 honeydew production and honeydew composition in the aphid *Metopeurum*  
737 *fuscoviride*: implications for ant-attendance. *J. Insect Physiol.* 48:319–326.

738 Fleet, G. 2003. Yeast interactions and wine flavour. *Int. J. Food Microbiol.* 86:11–22.

739 Fleet, G. H. 2008. Wine yeasts for the future. *FEMS Yeast Res.* 8:979–995.

740 Gause, G. F. 1934. The struggle for existence. Williams and Wilkins Co., Baltimore, MD.

741 Goddard, M. R. 2008. Quantifying the complexities of *Saccharomyces cerevisiae*'s  
742 ecosystem engineering via fermentation. *Ecology* 89:2077–2082.

- 743 Goddard, M. R., and D. Greig. 2015. A neutral nomad hypothesis for *Saccharomyces*  
744 *cerevisiae*. FEMS Yeast Res. Advanced online publication.  
745 doi:10.1093/femsyr/fov009.
  
- 746 Gonçalves, P., E. Valério, C. Correia, J. M. G. C. F. de Almeida, and J. P. Sampaio.  
747 2011. Evidence for divergent evolution of growth temperature preference in  
748 sympatric *Saccharomyces* species. PLoS One 6:e20739.
  
- 749 Gutiérrez, A. R., S. Epifanio, P. Garijo, R. Lópes, and P. Santamaría. 2001. Killer yeasts:  
750 Incidence in the ecology of spontaneous fermentation. Am. J. Enol. Vitic. 52:352–  
751 356.
  
- 752 Hagman, A., T. Säll, C. Compagno, and J. Piskur. 2013. Yeast “make-accumulate-  
753 consume” life strategy evolved as a multi-step process that predates the whole  
754 genome duplication. PLoS One 8:e68734.
  
- 755 Hartl, D. L., and A. G. Clark. 1989. Principles of population genetics. 2nd ed. Sinauer  
756 Associates, Inc., Sunderland, MA.
  
- 757 Henschke, P. A., and V. Jiranek. 1993. Yeasts—Metabolism of nitrogen compounds. Pp.  
758 77–164 in G. H. Fleet, ed. Wine microbiology and biotechnology. Harwood  
759 Academic Publishers, Chur, Switzerland.
  
- 760 Hoffman, C. S. 2002. Rapid Isolation of Yeast Chromosomal DNA. Pp. 44–45 in F. M.  
761 Ausubel, R. Brent, R. F. Kingston, D. D. Moore, J. G. Seidman, J. A. Smith, and

762 K. Struhl, eds. Short protocols in molecular biology. John Wiley & Sons, Inc.,  
763 USA.

764 Holm Hansen, E., P. Nissen, P. Sommer, J. C. Nielsen, and N. Arneborg. 2001. The  
765 effect of oxygen on the survival of non-*Saccharomyces* yeasts during mixed  
766 culture fermentations of grape juice with *Saccharomyces cerevisiae*. J. Appl.  
767 Microbiol. 91:541–7.

768 Hyma, K. E., and J. C. Fay. 2013. Mixing of vineyard and oak-tree ecotypes of  
769 *Saccharomyces cerevisiae* in North American vineyards. Mol. Ecol. 22:2917–30.

770 Ihmels, J., S. Bergmann, M. Gerami-Nejad, I. Yanai, M. McClellan, J. Berman, and N.  
771 Barkai. 2005. Rewiring of the yeast transcriptional network through the evolution  
772 of motif usage. Science 309:938–40.

773 Jolly, N. P., O. P. H. Augustyn, and I. S. Pretorius. 2006. The role and use of non-  
774 *Saccharomyces* yeasts in wine production. South African J. Enol. Vitic. 27:15–39.

775 King, C. R., and T. Scott-horton. 2007. Pyrosequencing®: A simple method for accurate  
776 genotyping. Pp. 39–55 in S. Marsh, ed. Pyrosequencing® protocols. Humana  
777 Press Inc., Totowa, NJ.

778 Kõljalg, U., R. H. Nilsson, K. Abarenkov, L. Tedersoo, A. F. Taylor, M. Bahram, S. T.  
779 Bates, T. D. Bruns, J. Bengtsson-Palme, T. M. Callaghan, B. Douglas, T.  
780 Drenkhan, U. Eberhardt, M. Dueñas, T. Grebenc, G. W. Griffith, M. Hartmann, P.

781 M. Kirk, P. Kohout, E. Larsson, B. D. Lindahl, R. Lücking, M. P. Martín, P. B.  
782 Matheny, N. H. Nguyen, T. Niskanen, J. Oja, K. G. Peay, U. Peintner, M.  
783 Peterson, K. Pöldmaa, L. Saag, I. Saar, A. Schüßler, J. A. Scott, C. Senés, M. E.  
784 Smith, A. Suija, D. L. Taylor, M. T. Telleria, M. Weiss, and K. H. Larsson. 2013.  
785 Towards a unified paradigm for sequence-based identification of fungi. *Mol Ecol.*  
786 22:5271-7.

787 Kurtzman, C. P., J. W. Fell, and T. Boekhout (eds). 2011. *The Yeasts: A taxonomic*  
788 *study*. 5th ed. Elsevier Science & Technology Books, San Diego, CA.

789 Kurtzman, C., and C. Robnett. 2003. Phylogenetic relationships among yeasts of the  
790 '*Saccharomyces* complex' determined from multigene sequence analyses. *FEMS*  
791 *Yeast Res.* 3:417–432.

792 Larson G., P. A. Stephens, J. J. Tehrani, R. H. Layton. 2013. Exapting exaptation. *Trends*  
793 *Ecol. Evol.* 28:497-8.

794 Lavebratt, C., and S. Sengul. 2006. Single nucleotide polymorphism (SNP) allele  
795 frequency estimation in DNA pools using Pyrosequencing. *Nat. Protoc.* 1:2573–  
796 82.

797 Lin, Z., T. Y. Wang, B. S. Tsai, F. T. Wu, F. J. Yu, Y. J. Tseng, H. M. Sung, and W. H.  
798 Li. 2013. Identifying cis-regulatory changes involved in the evolution of aerobic  
799 fermentation in yeasts. *Genome Biol. Evol.* 5:1065–1078.

- 800 MacLean, R. C., and I. Gudelj. 2006. Resource competition and social conflict in  
801 experimental populations of yeast. *Nature* 441:498–501.
- 802 Madeira, A., L. Leitão, G. Soveral, P. Dias, C. Prista, T. Moura, and M. C. Loureiro-  
803 Dias. 2010. Effect of ethanol on fluxes of water and protons across the plasma  
804 membrane of *Saccharomyces cerevisiae*. *FEMS Yeast Res.* 10:252–8.
- 805 Magliani, W., S. Conti, M. Gerloni, D. Bertolotti, and L. Polonelli. 1997. Yeast killer  
806 systems. *Clin. Microbiol. Rev.* 10:369–400.
- 807 Maqueda, M., E. Zamora, M. L. Álvarez, and M. Ramírez. 2012. Characterization,  
808 ecological distribution, and population dynamics of *Saccharomyces sensu stricto*  
809 killer yeasts in the spontaneous grape must fermentations of southwestern Spain.  
810 *Appl. Environ. Microbiol.* 78:735–43.
- 811 Merico, A., P. Sulo, J. Piskur, and C. Compagno. 2007. Fermentative lifestyle in yeasts  
812 belonging to the *Saccharomyces* complex. *FEBS J.* 274:976–89.
- 813 Moskalev EA, M. G. Zavgorodnij, S. P. Majorova, I. A. Vorobjev, P. Jandaghi, I. V.  
814 Bure, and J. D. Hoheisel. 2011. Correction of PCR-bias in quantitative DNA  
815 methylation studies by means of cubic polynomial regression. *Nucleic Acids Res.*  
816 39:e77.
- 817 Musmanno, R., Di Maggio T, and G. Coratza. 1999. Studies on strong and weak killer  
818 phenotypes of wine yeasts: production, activity of toxin in must, and its effect in  
819 mixed culture fermentation. *J. Appl. Microbiol.* 87:932–938.

- 820 Naumov, G. I., I. Masneuf, E. S. Naumova, M. Aigle, and D. Dubourdieu. 2000.  
821 Association of *Saccharomyces bayanus* var. *uvarum* with some French wines:  
822 genetic analysis of yeast populations. Res. Microbiol. 151:683–91.
- 823 Naumov, G. I., E. S. Naumova, and P. D. Sniegowski. 1998. *Saccharomyces paradoxus*  
824 and *Saccharomyces cerevisiae* are associated with exudates of North American  
825 oaks. Can. J. Microbiol. 44:1045–50.
- 826 Near, T. J., A. Dornburg, K. L. Kuhn, J. T. Eastman, J. N. Pennington, T. Patarnello, L.  
827 Zane, D. a Fernández, and C. D. Jones. 2012. Ancient climate change, antifreeze,  
828 and the evolutionary diversification of Antarctic fishes. Proc. Natl. Acad. Sci. U.  
829 S. A. 109:3434–9.
- 830 Nissen, P., D. Nielsen, and N. Arneborg. 2004. The relative glucose uptake abilities of  
831 non-*Saccharomyces* yeasts play a role in their coexistence with *Saccharomyces*  
832 *cerevisiae* in mixed cultures. Appl. Microbiol. Biotechnol. 64:543–50.
- 833 Nissen, P., D. Nielsen, and N. Arneborg. 2003. Viable *Saccharomyces cerevisiae* cells at  
834 high concentrations cause early growth arrest of non-*Saccharomyces* yeasts in  
835 mixed cultures by a cell-cell contact-mediated mechanism. Yeast 20:331–41.
- 836 Pérez-Nevado, F., H. Albergaria, T. Hogg, and F. Girio. 2006. Cellular death of two non-  
837 *Saccharomyces* wine-related yeasts during mixed fermentations with  
838 *Saccharomyces cerevisiae*. Int. J. Food Microbiol. 108:336–45.



- 839 Pérez-Ortín J. E., A. Querol, S. Puig, and E. Barrio. 2002. Molecular characterization of a  
840 chromosomal rearrangement involved in the adaptive evolution of yeast strains.  
841 Genome Res. 12:1533-9.
- 842 Pfeiffer, T., S. Schuster, and S. Bonhoeffer. 2001. Cooperation and competition in the  
843 evolution of ATP-producing pathways. Science 292:504–7.
- 844 Pina, C., C. Santos, J. A. Couto, and T. Hogg. 2004. Ethanol tolerance of five non-  
845 *Saccharomyces* wine yeasts in comparison with a strain of *Saccharomyces*  
846 *cerevisiae*—influence of different culture conditions. Food Microbiol. 21:439–  
847 447.
- 848 Pinto, C., D. Pinho, S. Sousa, M. Pinheiro, C. Egas, and A. C. Gomes. 2014. Unravelling  
849 the diversity of grapevine microbiome. PLoS One 9:e85622.
- 850 Piper, P. W. 1995. The heat shock and ethanol stress responses of yeast exhibit extensive  
851 similarity and functional overlap. FEMS Microbiol. Lett. 134:121–7.
- 852 Piskur, J., and R. B. Langkjaer. 2004. Yeast genome sequencing: the power of  
853 comparative genomics. Mol. Microbiol. 53:381–9.
- 854 Piskur, J., E. Rozpedowska, S. Polakova, A. Merico, and C. Compagno. 2006. How did  
855 *Saccharomyces* evolve to become a good brewer? Trends Genet. 22:183–6.
- 856 Pretorius, I. 2000. Tailoring wine yeast for the new millennium: novel approaches to the  
857 ancient art of winemaking. Yeast 16:675–729.

- 858 Pronk, J. T., H. Y. Steensma, and J. P. van Dijken. 1996. Pyruvate metabolism in  
859 *Saccharomyces cerevisiae*. *Yeast* 12:1607–1633.
- 860 R Development Core Team, R. 2013. R: A language and environment for statistical  
861 computing. R Foundation for Statistical Computing.
- 862 Radler, F. 1993. Yeasts—Metabolism of organic acids. Pp. 165–182 in G. H. Fleet, ed.  
863 Wine microbiology and biotechnology. Harwood Academic Publishers, Chur,  
864 Switzerland.
- 865 Redzepović, S., S. Orlić, S. Sikora, a Majdak, and I. S. Pretorius. 2002. Identification and  
866 characterization of *Saccharomyces cerevisiae* and *Saccharomyces paradoxus*  
867 strains isolated from Croatian vineyards. *Lett. Appl. Microbiol.* 35:305–10.
- 868 Rementeria, A., J. A. Rodriguez, A. Cadaval, R. Amenabar, J. R. Muguruza, F. L.  
869 Hernando, and M. J. Sevilla. 2003. Yeast associated with spontaneous  
870 fermentations of white wines from the “Txakoli de Bizkaia” region (Basque  
871 Country, North Spain). *Int. J. Food Microbiol.* 86:201–207.
- 872 Ritz, C., and J. C. Streibig. 2005. Bioassay analysis using R. *J. Stat. Softw.* 12:1–22.
- 873 Rodicio, R., and J. J. Heinisch. 2009. Sugar metabolism by *Saccharomyces* and non-  
874 *Saccharomyces* yeasts. Pp. 113–134 in H. König, G. Unden, and J. Fröhlich, eds.  
875 Biology of microorgaisms on grapes, in must and in wine. Springer, Berlin  
876 Heidelberg, Germany.

877 Rodríguez-Cousiño, N., M. Maqueda, J. Ambrona, E. Zamora, R. Esteban, and M.  
878 Ramírez. 2011. A new wine *Saccharomyces cerevisiae* killer toxin (Klus),  
879 encoded by a double-stranded rna virus, with broad antifungal activity is  
880 evolutionarily related to a chromosomal host gene. Appl. Environ. Microbiol.  
881 77:1822–32.

882 Salichos, L., and A. Rokas. 2013. Inferring ancient divergences requires genes with  
883 strong phylogenetic signals. Nature 497:327–31.

884 Salvadó, Z., F. N. Arroyo-López, E. Barrio, A. Querol, and J. M. Guillamón. 2011a.  
885 Quantifying the individual effects of ethanol and temperature on the fitness  
886 advantage of *Saccharomyces cerevisiae*. Food Microbiol. 28:1155–61.

887 Salvadó, Z., F. N. Arroyo-López, J. M. Guillamón, G. Salazar, A. Querol, and E. Barrio.  
888 2011b. Temperature adaptation markedly determines evolution within the genus  
889 *Saccharomyces*. Appl. Environ. Microbiol. 77:2292–302.

890 Sangorrín, M. P., C. A. Lopes, M. R. Giraudo, and A. C. Caballero. 2007. Diversity and  
891 killer behaviour of indigenous yeasts isolated from the fermentation vat surfaces  
892 in four Patagonian wineries. Int. J. Food Microbiol. 119:351–7.

893 Scannell D. R., K. P. Byrne, J. L. Gordon, S. Wong, K. H. Wolfe. 2006. Multiple rounds  
894 of speciation associated with reciprocal gene loss in polyploid yeasts. Nature  
895 440:341–5.

896 Schranz, M. E., S. Mohammadin, and P. P. Edger. 2012. Ancient whole genome  
897 duplications, novelty and diversification: the WGD Radiation Lag-Time Model.  
898 Curr. Opin. Plant Biol. 15:147–53.

899 Serjeant, K., R. Tang, N. Anfang, J. R. Beggs, and M. R. Goddard. 2008. Yeasts  
900 associated with the New Zealand Nothofagus honeydew system. NZ J.  
901 Ecol. 32:209–213.

902 Sipiczka, M., P. Romano, G. Lipani, I. Miklos, and Z. Antunovics. 2001. Analysis of  
903 yeasts derived from natural fermentation in a Tokaj winery. Antonie Van  
904 Leeuwenhoek 79:97–105.

905 Sniegowski, P. D., P. G. Dombrowski, and E. Fingerman. 2002. *Saccharomyces*  
906 *cerevisiae* and *Saccharomyces paradoxus* coexist in a natural woodland site in  
907 North America and display different levels of reproductive isolation from  
908 European conspecifics. FEMS Yeast Res. 1:299–306.

909 Thomson, J. M., E. a Gaucher, M. F. Burgan, D. W. De Kee, T. Li, J. P. Aris, and S. A.  
910 Benner. 2005. Resurrecting ancestral alcohol dehydrogenases from yeast. Nat.  
911 Genet. 37:630–5.

912 Torija, M. J., N. Rozès, M. Poblet, J. M. Guillamón, and A. Mas. 2001. Yeast population  
913 dynamics in spontaneous fermentations: comparison between two different wine-  
914 producing areas over a period of three years. Antonie Van Leeuwenhoek 79:345–  
915 52.

916 Torriani, S., G. Zapparoli, and G. Suzzi. 1999. Genetic and phenotypic diversity of  
 917 *Saccharomyces sensu stricto* strains isolated from Amarone wine. *Antonie Van*  
 918 *Leeuwenhoek* 75:207–15.

919 Valero E., B. Cambon, D. Schuller, M. Casal, S. Dequin. 2007. Biodiversity of  
 920 *Saccharomyces* yeast strains from grape berries of wine-producing areas using  
 921 starter commercial yeasts. *FEMS Yeast Res.* 7:317-29.

922 Van Vuuren, H. J. J., and C. J. Jacobs. 1992. Killer yeasts in the wine industry: A review.  
 923 *Am. J. Enol. Vitic.* 43:119–128.

924 Wang, Q.-M., W.-Q. Liu, G. Liti, S.-A. Wang, and F.-Y. Bai. 2012. Surprisingly  
 925 diverged populations of *Saccharomyces cerevisiae* in natural environments  
 926 remote from human activity. *Mol. Ecol.* 21:5404–17.

927 Warringer J., E. Zörgö, F. A. Cubillos, A. Zia, A. Gjuvsland, J. T. Simpson, A. Forsmark,  
 928 R. Durbin, S. W. Omholt, E. J. Louis, G. Liti, A. Moses, A. Blomberg. 2011. Trait  
 929 variation in yeast is defined by population history. *PLoS Genet.* 7:e1002111.

930 Wing, S. L., and L. D. Boucher. 1998. Ecological aspects of the Cretaceous flowering  
 931 plant radiation. *Annu. Rev. Earth Planet. Sci.* 26:379–421.

932 Wolfe, K. H., and D. C. Shields. 1997. Molecular evidence for an ancient duplication of  
 933 the entire yeast genome. *Nature* 387:708–13.

- 934 Yuasa N., Y. Nakagawa, M. Hayakawa, and Y. Iimura. 2004. Distribution of the sulfite  
 935 resistance gene SSU1-R and the variation in its promoter region in wine yeasts. J  
 936 Biosci. Bioeng. 98:394–7.
- 937 Zhang, H., A. Skelton, R. C. Gardner, and M. R. Goddard. 2010. *Saccharomyces*  
 938 paradoxus and *Saccharomyces cerevisiae* reside on oak trees in New Zealand:  
 939 evidence for migration from Europe and interspecies hybrids. FEMS Yeast Res.  
 940 10:941–7.

## Figure Legends

**Figure 1. Phylogenetic relationship of yeast species used in this study.** The phylogeny is based on two previous studies (Kurtzman and Robnett 2003; Salichos and Rokas 2013) and the placement of the *Nakaseomyces* (*C. glabrata* and *N. bacillisporus*) using chromosome rearrangements (Scannell et al. 2006). The whole genome duplication (WGD) event is shown by a star.

**Figure 2. Fitness differences of *S. cerevisiae* relative to WGD and non-WGD yeast species after co-culture or mono-culture in two high-sugar environments.** The fitness of each species in Grape (A) and HS (B) co-cultures and Grape (C) and HS (D) mono-cultures. Bars and whiskers represent the mean and standard error ( $n = 3$ ) of the difference between the competitor fitness ( $w_c$ ) and the *S. cerevisiae* (YPS163) reference fitness ( $w_r$ ), which is set to one. Species labels are Scer (*S. cerevisiae*), Spar (*S. paradoxus*), Smik (*S. mikatae*), Suva (*S. uvarum*), Cgla (*C. glabrata*), Ncas (*N. castellii*), Vpol (*V. polyspora*), Tdel (*T. delbruekii*), Lthe (*L. thermotolerans*), Lwal (*L. waltii*), Lklu (*L. kluyveri*), Hvin (*H. vineae*) and WGD and non-WGD species are indicated. Fitness significantly different from the reference is shown for  $FDR < 0.01$  (\*).

**Figure 3. Fitness differences depend on temperature and growth medium.** Fitness differences between each competitor species and a reference strain are shown for competitions at 30°C in Grape (A) or HS (B) and at 22°C in Grape (C) or HS (D)

medium. Reference strains are three *S. cerevisiae* strains (YPS163, BJ20 and I14) and *S. paradoxus* (Spar). Bars and whiskers represent the mean and its standard error (n = 3). Significant differences in fitness are shown for FDR < 0.05 (\*). Species abbreviations are the same as in Figure 2.

**Figure 4. Intrinsic growth rate differences in high-sugar environments.** The intrinsic growth rate of each species in Grape (A) and HS (B). WGD and non-WGD species are indicated. Bars and whiskers represent the mean and standard deviation of the growth rate (n = 3). Species that did not differ significantly from *S. cerevisiae* at an FDR cutoff of 0.01 are indicated (NS).

**Figure 5. Species differences in ethanol tolerance.** Mean (bars) and standard error (whiskers) of the concentration of ethanol (%) that inhibits growth by 50% (IC<sub>50</sub>) of each yeast species (n = 3). WGD and non-WGD species are indicated. Species with an IC<sub>50</sub> that did not differ significantly from *S. cerevisiae* at an FDR cutoff of 0.01 are indicated (NS).

**Figure 6. Intrinsic growth differences in response to low-pH.** (A) The effect of low-pH treatment on the intrinsic growth rate (r) of each species in HS ( $\Delta r_{Treatment} = r_{Treatment} - r_{HS}$ ), and (B) the difference in the intrinsic growth rate between *S. cerevisiae* and each species in low-pH HS ( $\Delta r_{Species} = r_{non-S. cerevisiae} - r_{S. cerevisiae}$ ). WGD and non-WGD species are indicated. Whiskers for each bar show 95% confidence intervals (n = 3). Significant differences in the growth rate of each species with or without low-pH and differences



between *S. cerevisiae* and each species in low-pH are shown for FDR < 0.01 (\*) and FDR < 0.001 (\*\*).

**Figure 7. Intrinsic growth rate in Grape supplemented with nutrients.** The mean intrinsic growth rate of each species in Grape supplemented with nutrients (YP). WGD and non-WGD species are indicated. Bars and whiskers represent the mean and standard deviation of the growth rate (n = 3). Diamonds represent the mean growth rate in Grape without YP. Significant differences in the growth rate of each species with or without YP (a) and differences between *S. cerevisiae* and each species in YP (b) are labeled above each bar for FDR < 0.01.

## **Supplemental Information**

**Table S1. Yeast strains used in this study.**

**Table S2. PCR and pyrosequencing primers.**

**Table S3. PCR primers, barcodes and adaptors used for high-throughput sequencing.**

**Table S4. Significance of changes in the relative abundance of *S. cerevisiae* compared to other yeast species in high-sugar environments.**

1007

1008 **Table S5. Significance of intrinsic growth rate differences between *S. cerevisiae* and**  
 1009 **other yeast species in high-sugar environments.**

1010

1011 **Table S6. Significance of IC<sub>50</sub> and intrinsic growth rate differences between *S.***  
 1012 ***cerevisiae* and other yeast species in ethanol (%).**

1013

1014 **Table S7. Significance of intrinsic growth rate differences between each species' own**  
 1015 **supernatant and supernatant from *S. cerevisiae* mono-culture and co-culture.**

1016

1017 **Table S8. Significance of low-pH on the intrinsic growth rate of *S. cerevisiae* and**  
 1018 **other species in HS.**

1019

1020 **Table S9. Significance of nutrient supplements on the intrinsic growth rate of *S.***  
 1021 ***cerevisiae* and other species in Grape.**

1022

1023

1024

1025 **Figure S1. Pyrosequencing calibration.** Relationship between the known frequency (%)  
 1026 of the reference species based on cell density and the estimated frequency (%) of the  
 1027 reference species based on pyrosequencing relative to *S. cerevisiae* (YPS163). Reference

species include *S. cerevisiae* (I14) (A), *S. paradoxus* (B), *S. mikatae* (C), *S. uvarum* (D),  
*C. glabrata* (E), *N. castellii* (F), *V. polyspora* (G), *Z. rouxii* (H), *T. delbrueckii* (I), *L.*  
*thermotolerans* (J), *L. waltii* (K), *L. kluyveri* (L), and *H. vineae* (M). Calibration  
equations based on linear or polynomial regression analysis and *R*-squared values for  
each model are indicated.

**Figure S2. High-throughput sequencing calibration.** Relationship between the known  
frequency (%) of the reference species based on cell density and the estimated frequency  
(%) of the reference species based on high-throughput sequencing. Panels show the  
relative abundance of the *S. cerevisiae* reference (YPS163) in comparison to *S.*  
*paradoxus* (A), *S. mikatae* (B) *S. uvarum* (C), *K. lodderae* (D), *C. glabrata* (E) and *N.*  
*castellii* (F); and the relative abundance of *S. paradoxus* (YPS152) in comparison to *S.*  
*mikatae* (G), *S. uvarum* (H), *K. lodderae* (I), *C. glabrata* (J) and *N. castellii* (K). *K.*  
*lodderae* and *N. castellii* calibrations with *S. cerevisiae* are based on ACT1; all others are  
based on ITS1. Calibration curves (blue lines) and *R*-squared values are shown in each  
panel.

**Figure S3. The effect of ethanol on the intrinsic growth rate of each species.** Each  
line shows mean intrinsic growth rate (*r*) of an individual species based on three  
replicates as a function of ethanol (%) added at the beginning of growth. Significant  
differences in the growth rate of each species and *S. cerevisiae* are shown for FDR < 0.01  
(shaded region). Error bars have been omitted for clarity.

1051

1052 **Figure S4. Intrinsic growth rate in YPD made with supernatant.** The intrinsic growth  
1053 rate of each species (A-O) in YPD made with the supernatant from each species' own  
1054 supernatant when grown in mono-culture (red), the supernatant from *S. cerevisiae*  
1055 (YPS163) grown in mono-culture (blue), and the supernatant from co-culture with *S.*  
1056 *cerevisiae* (green). Species are *S. cerevisiae* (I14) (A), *S. paradoxus* (B), *S. mikatae* (C),  
1057 *S. uvarum* (D), *K. lodderae* (E), *K. martiniae* (F), *N. castellii* (G), *C. glabrata* (H), *V.*  
1058 *polyspora* (I), *Z. rouxii* (J), *T. delbrueckii* (K), *L. thermotolerans* (L), *L. waltii* (M), *K.*  
1059 *lactis* (N), and *H. vineae* (O). Bars and whiskers represent the mean and standard  
1060 deviation of the growth rate.

1061

1062 **Figure S5. Intrinsic growth rate in Grape supplemented with various nutrients.** The  
1063 mean intrinsic growth rate of each species in Grape supplemented with CM (A), NB (B),  
1064 AA (C) and AS (D). Names of WGD (blue) and non-WGD (red) species are colored.  
1065 Bars and whiskers represent the mean and standard deviation of the growth rate.  
1066 Significant differences in the growth rate of each species with or without the added  
1067 nutrient (a) and differences between *S. cerevisiae* and each species with the added  
1068 nutrient (b) are labeled above each bar for FDR < 0.01.

Figure 1

bioRxiv preprint doi: <https://doi.org/10.1101/020370>; this version posted June 3, 2015. The copyright holder for this preprint (which was not certified by peer review) is the author/funder, who has granted bioRxiv a license to display the preprint in perpetuity. It is made available under aCC-BY-NC 4.0 International license.

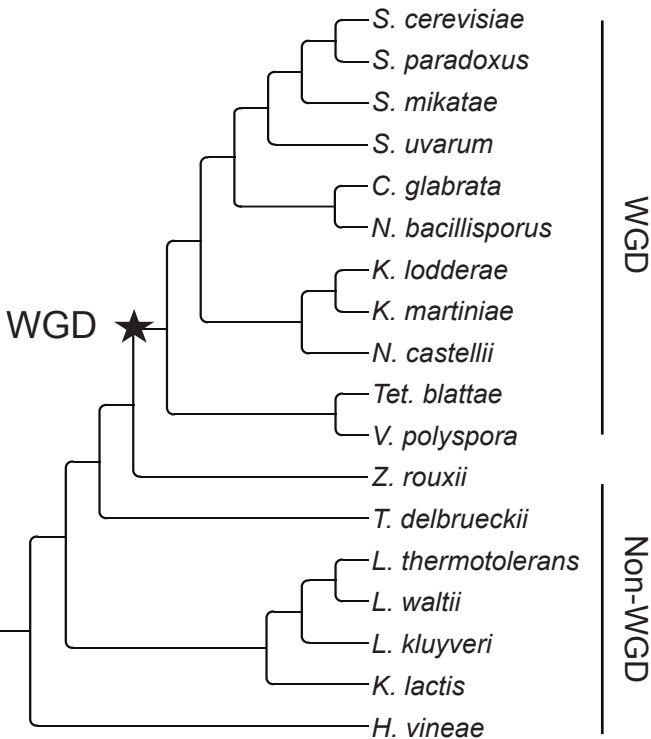

Figure 2

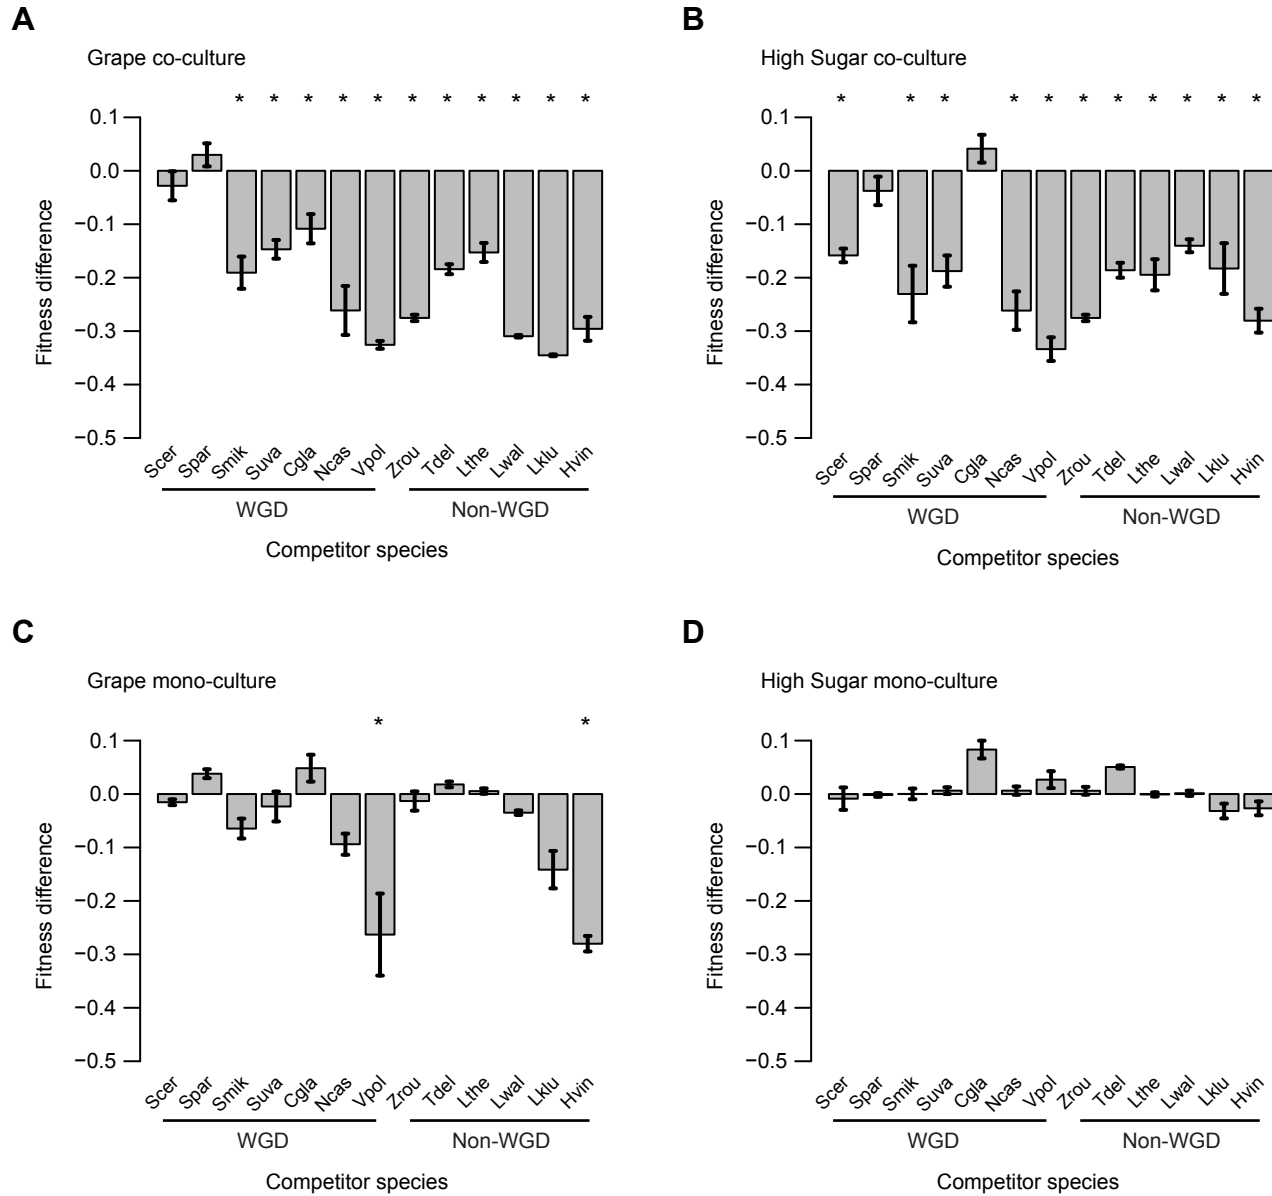

Figure 3

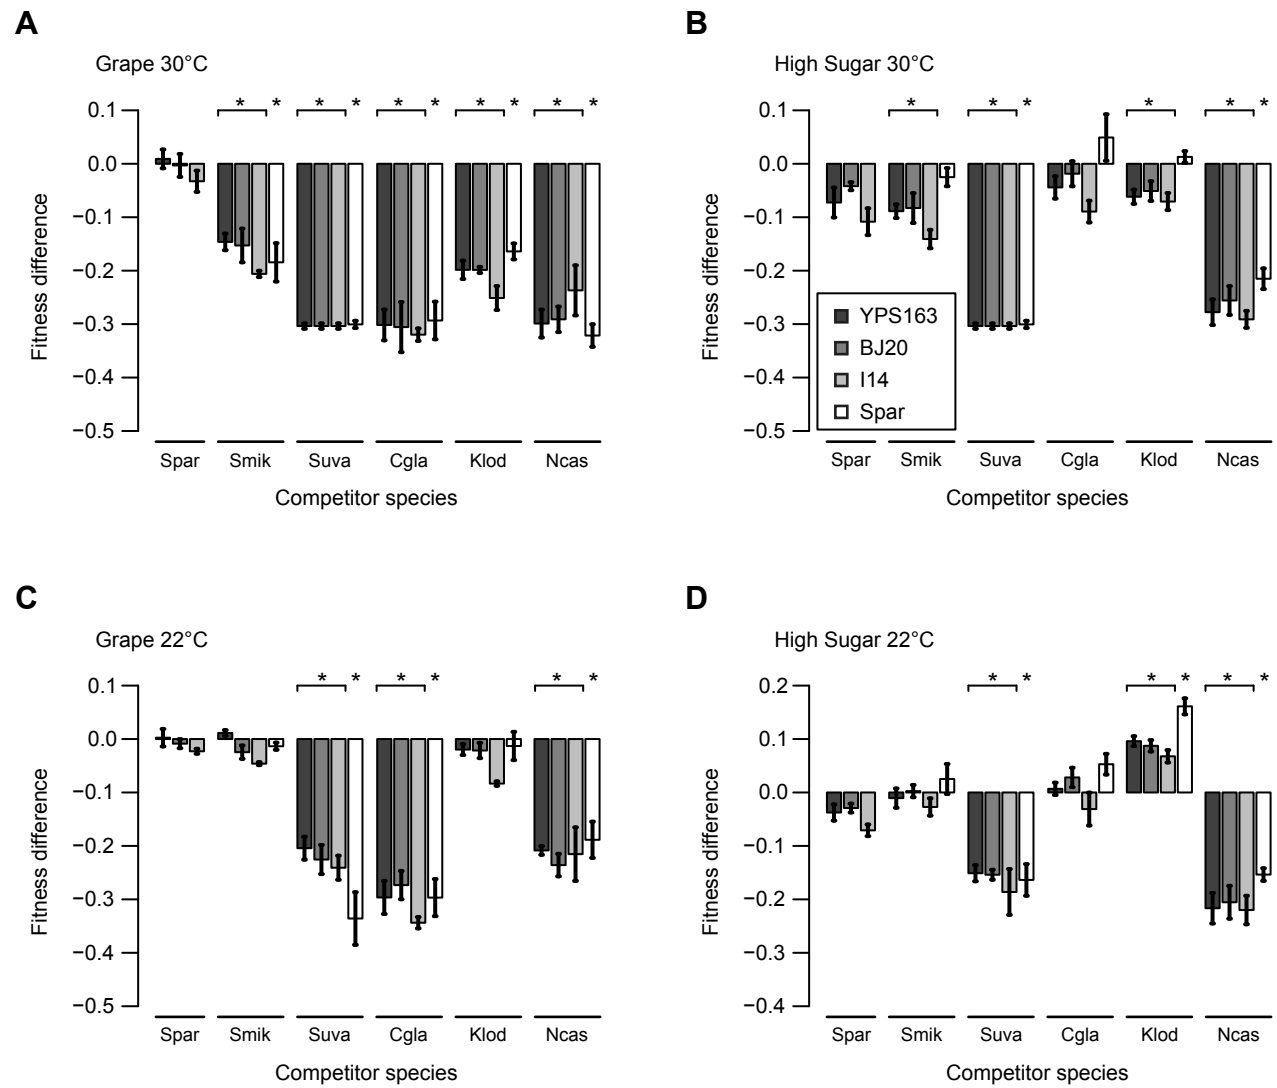

Figure 4

bioRxiv preprint doi: <https://doi.org/10.1101/020370>; this version posted June 3, 2015. The copyright holder for this preprint (which was not certified by peer review) is the author/funder, who has granted bioRxiv a license to display the preprint in perpetuity. It is made available under aCC-BY-NC 4.0 International license.

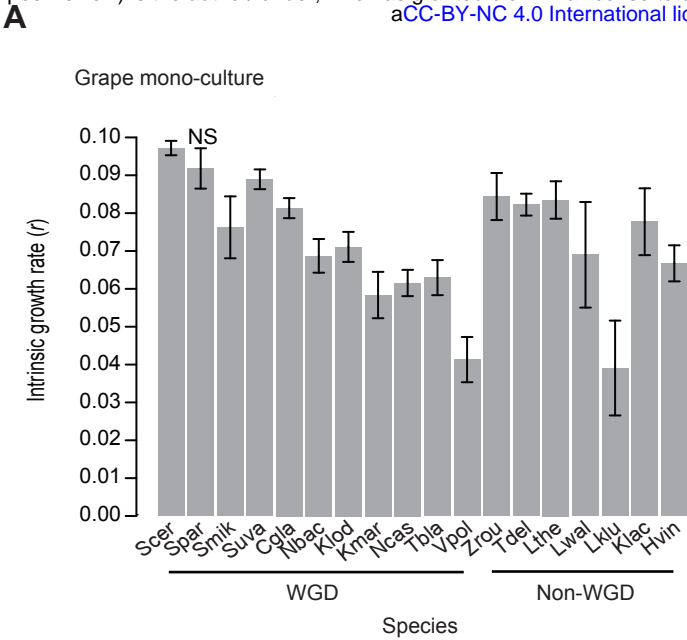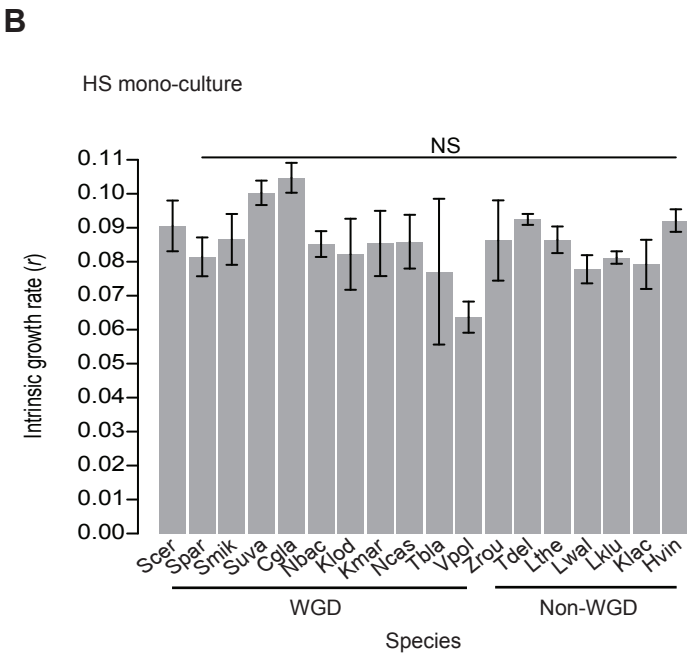



Figure 5

bioRxiv preprint doi: <https://doi.org/10.1101/020370>; this version posted June 3, 2015. The copyright holder for this preprint (which was not certified by peer review) is the author/funder, who has granted bioRxiv a license to display the preprint in perpetuity. It is made available under aCC-BY-NC 4.0 International license.

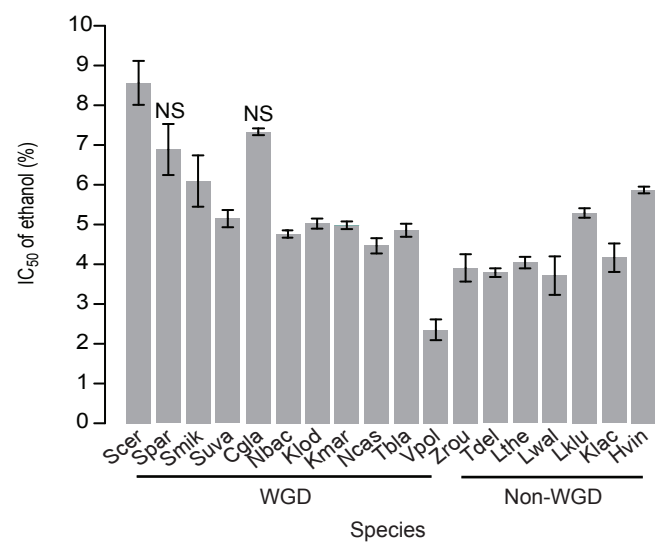

Figure 6

bioRxiv preprint doi: <https://doi.org/10.1101/020370>; this version posted June 3, 2015. The copyright holder for this preprint (which was not certified by peer review) is the author/funder, who has granted bioRxiv a license to display the preprint in perpetuity. It is made available under aCC-BY-NC 4.0 International license.

**A**

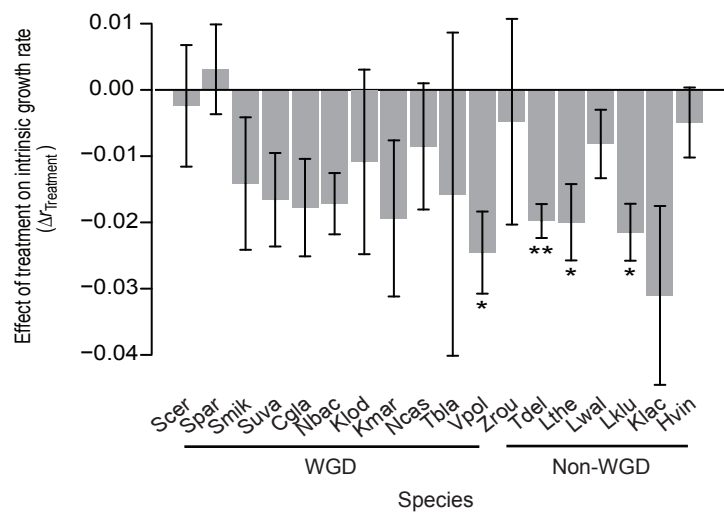

**B**

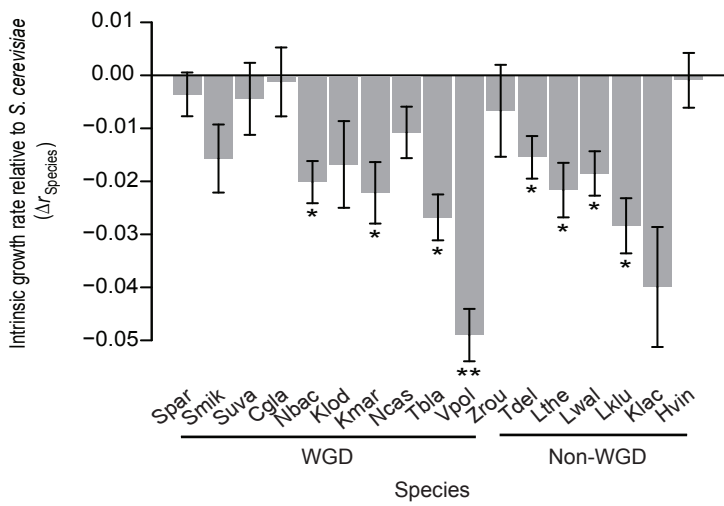

Figure 7

bioRxiv preprint doi: <https://doi.org/10.1101/020370>; this version posted June 3, 2015. The copyright holder for this preprint (which was not certified by peer review) is the author/funder, who has granted bioRxiv a license to display the preprint in perpetuity. It is made available under aCC-BY-NC 4.0 International license.

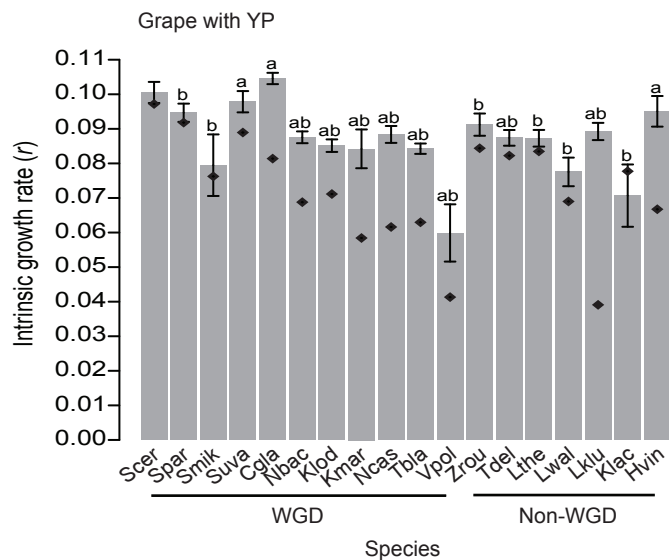

Figure S1 A-F

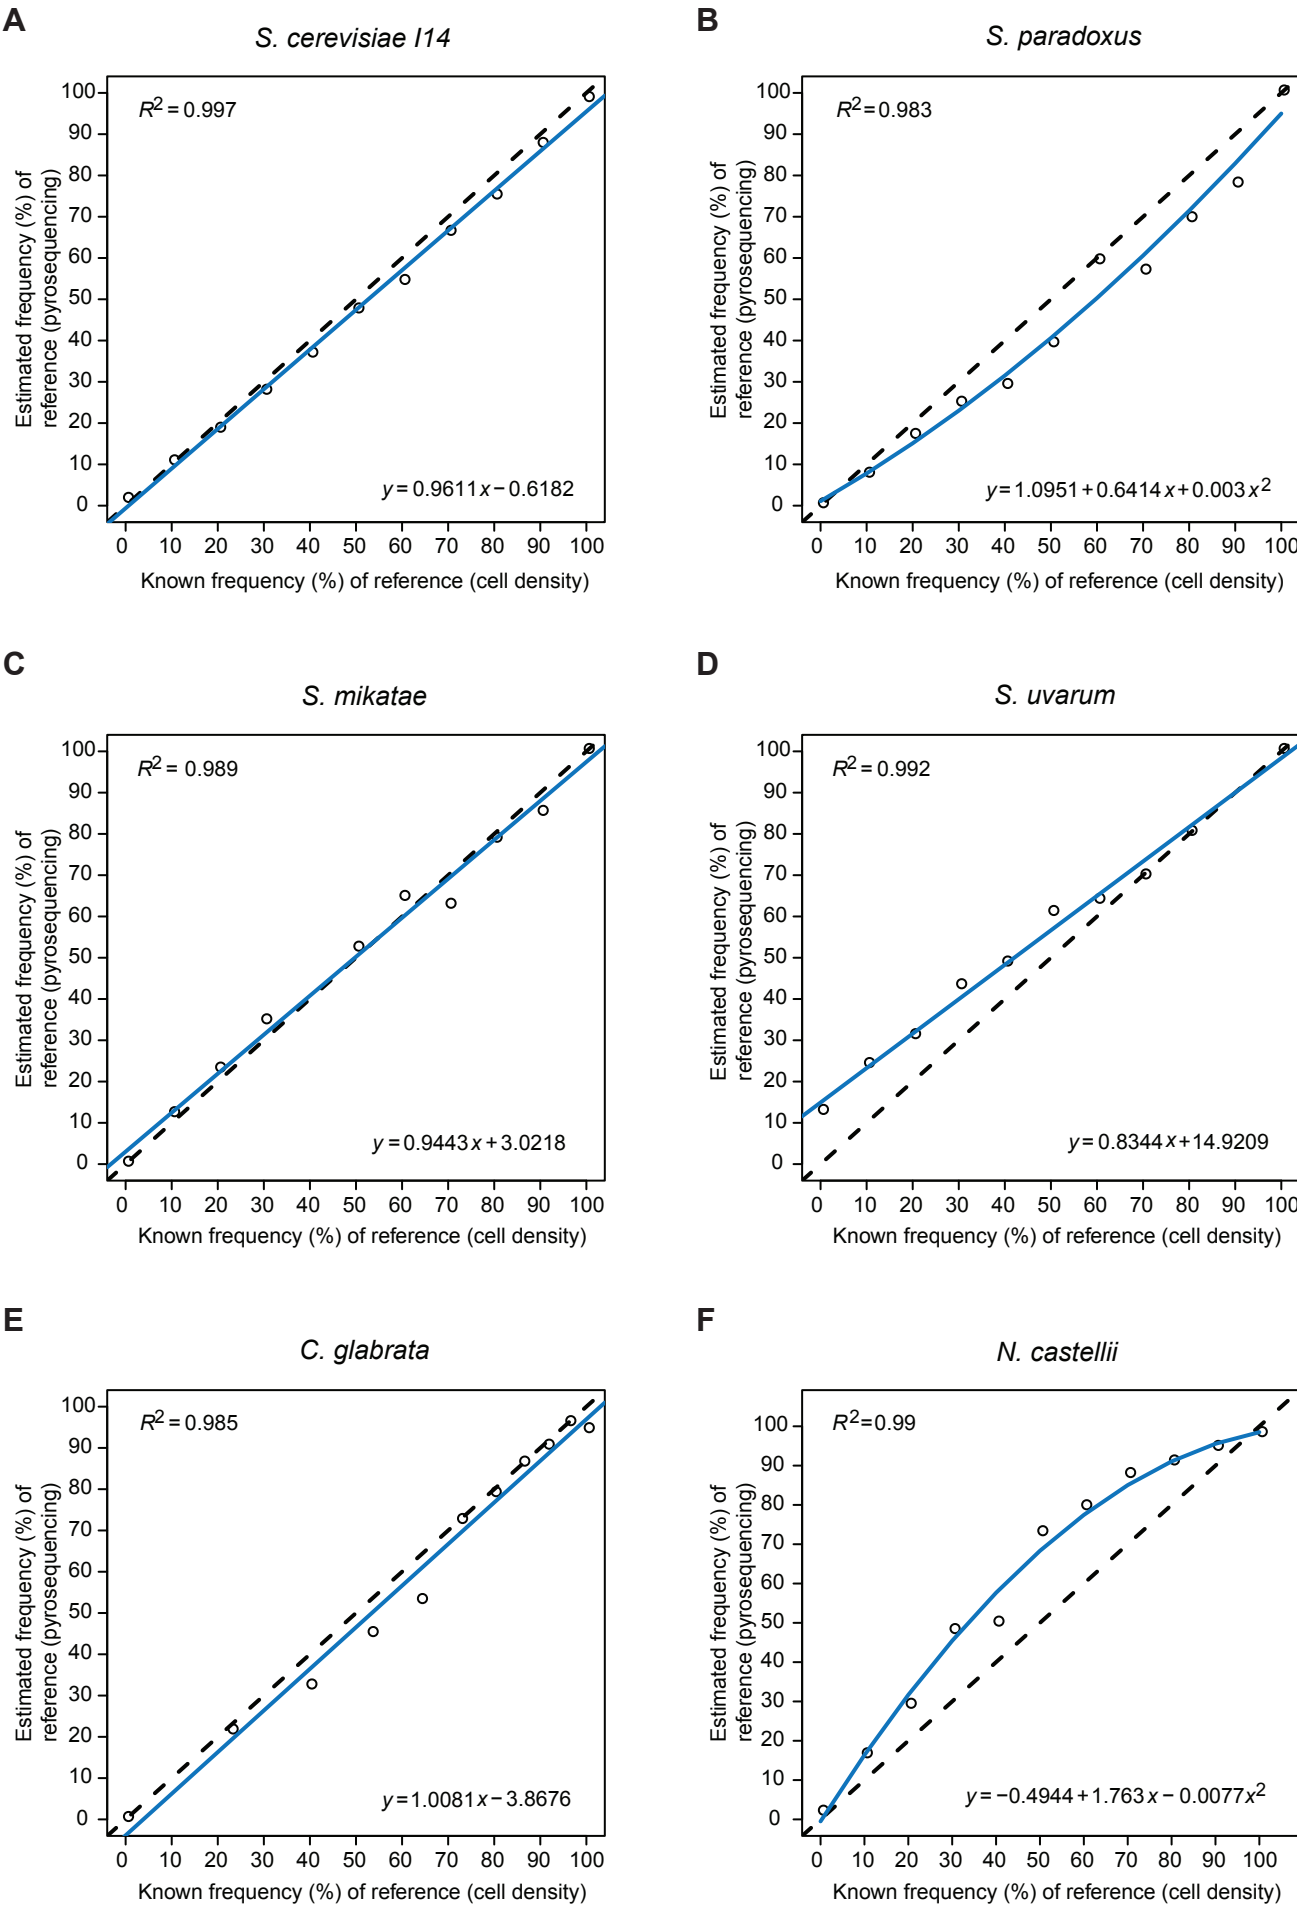

Figure S1 G-L

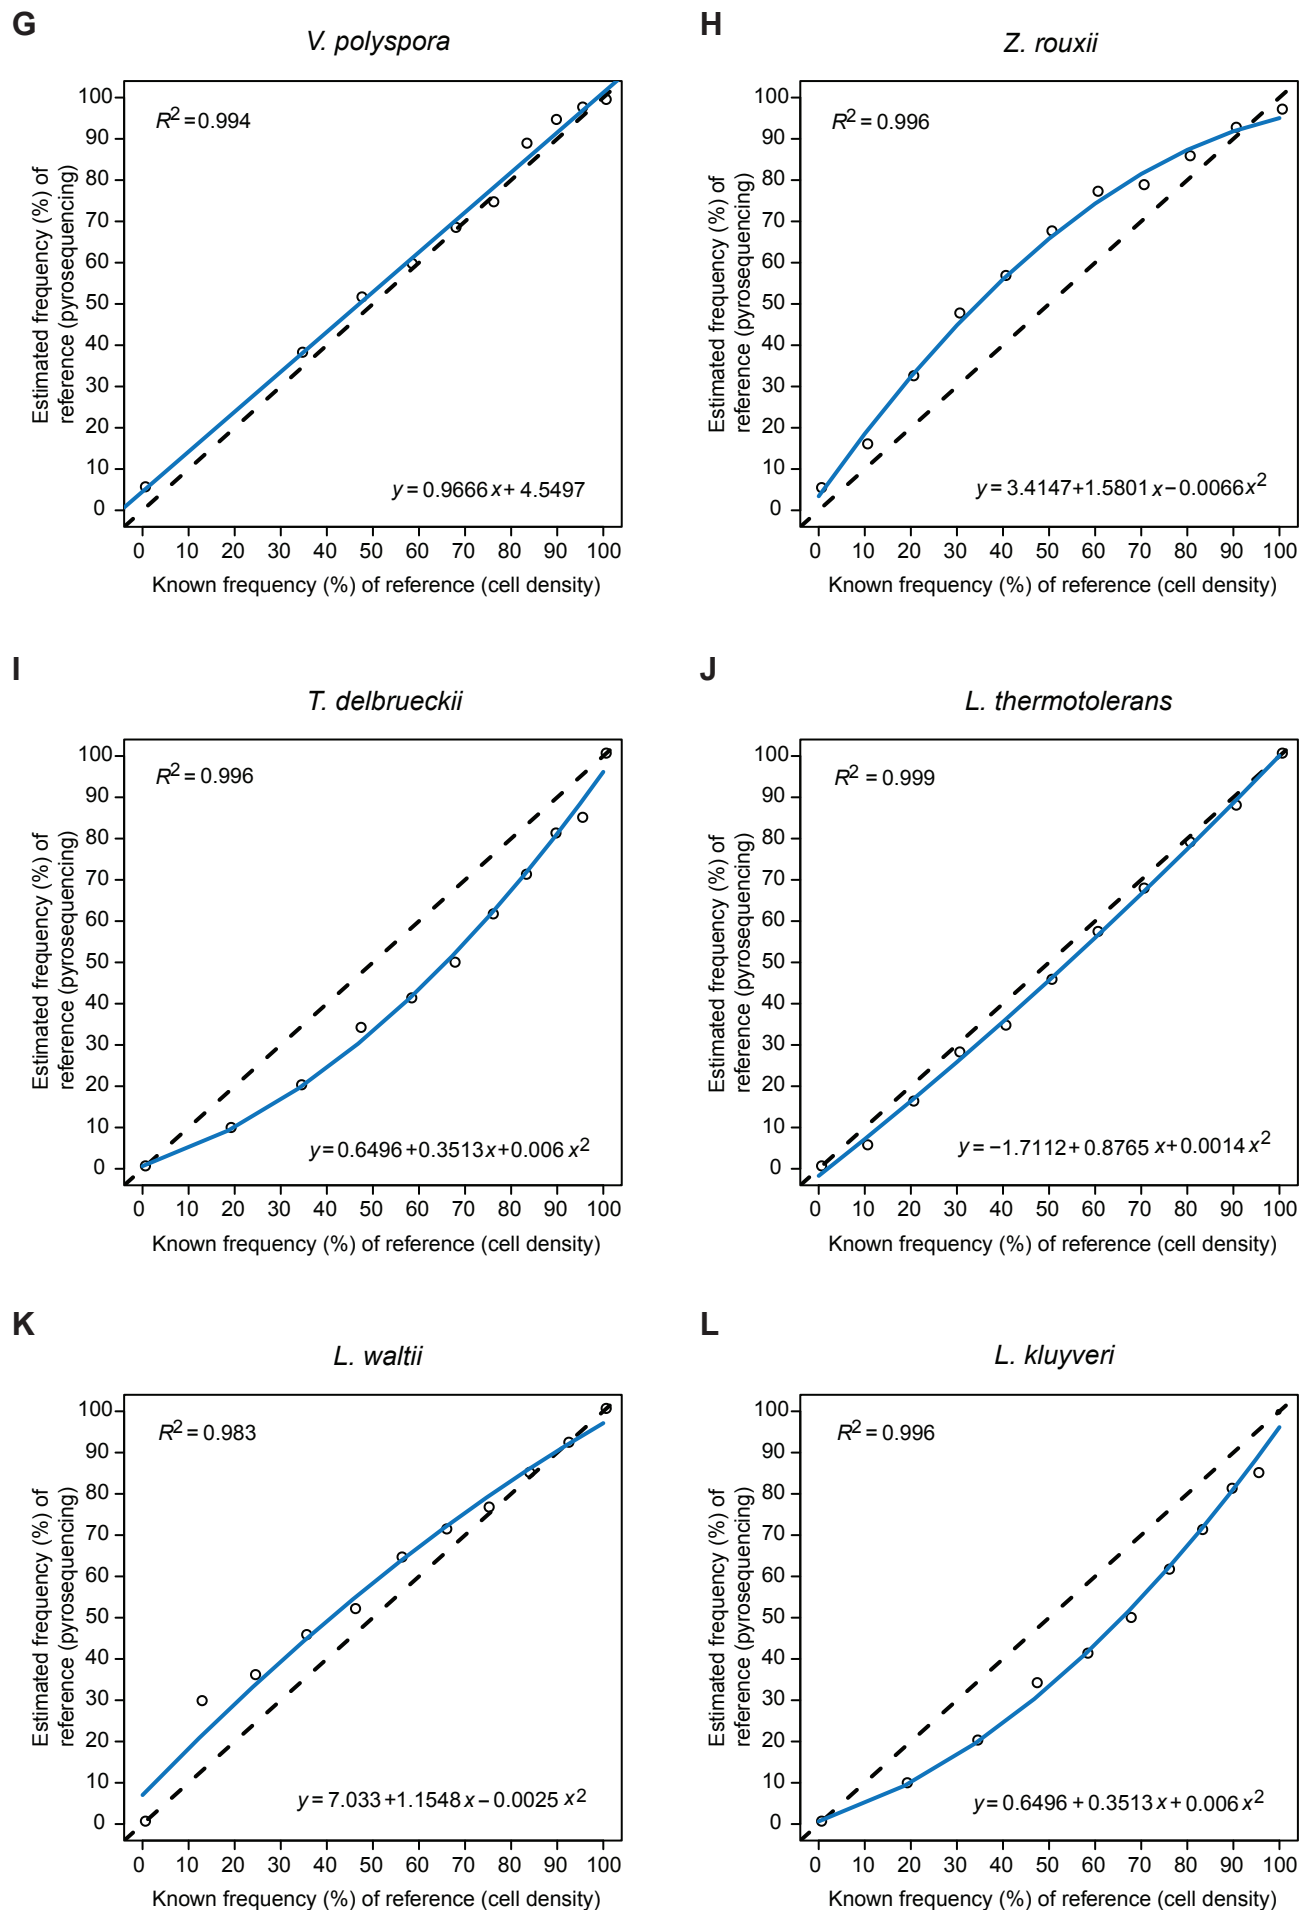

## Figure S1 M

M

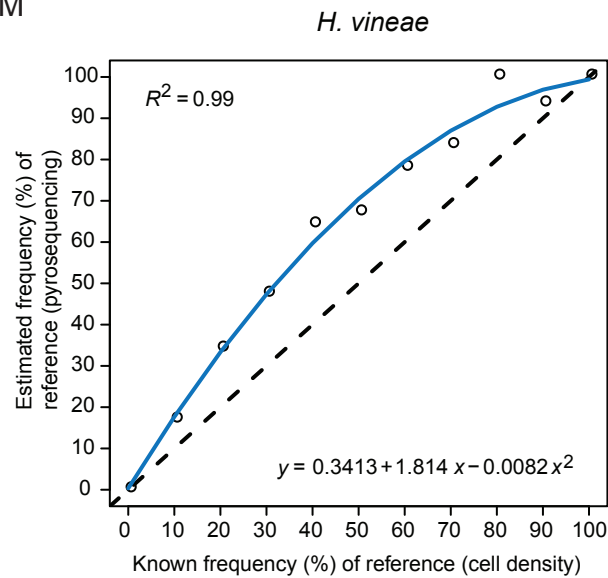

Figure S1. Pyrosequencing calibration. Relationship between the known frequency (%) of the reference species based on cell density and the estimated frequency (%) of the reference species based on pyrosequencing relative to *S. cerevisiae* (YPS163). Reference species are *S. cerevisiae* (I14) (A), *S. paradoxus* (B), *S. mikatae* (C), *S. uvarum* (D), *C. glabrata* (E), *N. castellii* (F), *V. polyspora* (G), *Z. rouxii* (H), *T. delbrueckii* (I), *L. thermotolerans* (J), *L. waltii* (K), *L. kluyveri* (L), and *H. vineae* (M). Calibration equations based on linear or polynomial regression analysis and R-squared values for each model are shown.

Figure S2 A-F

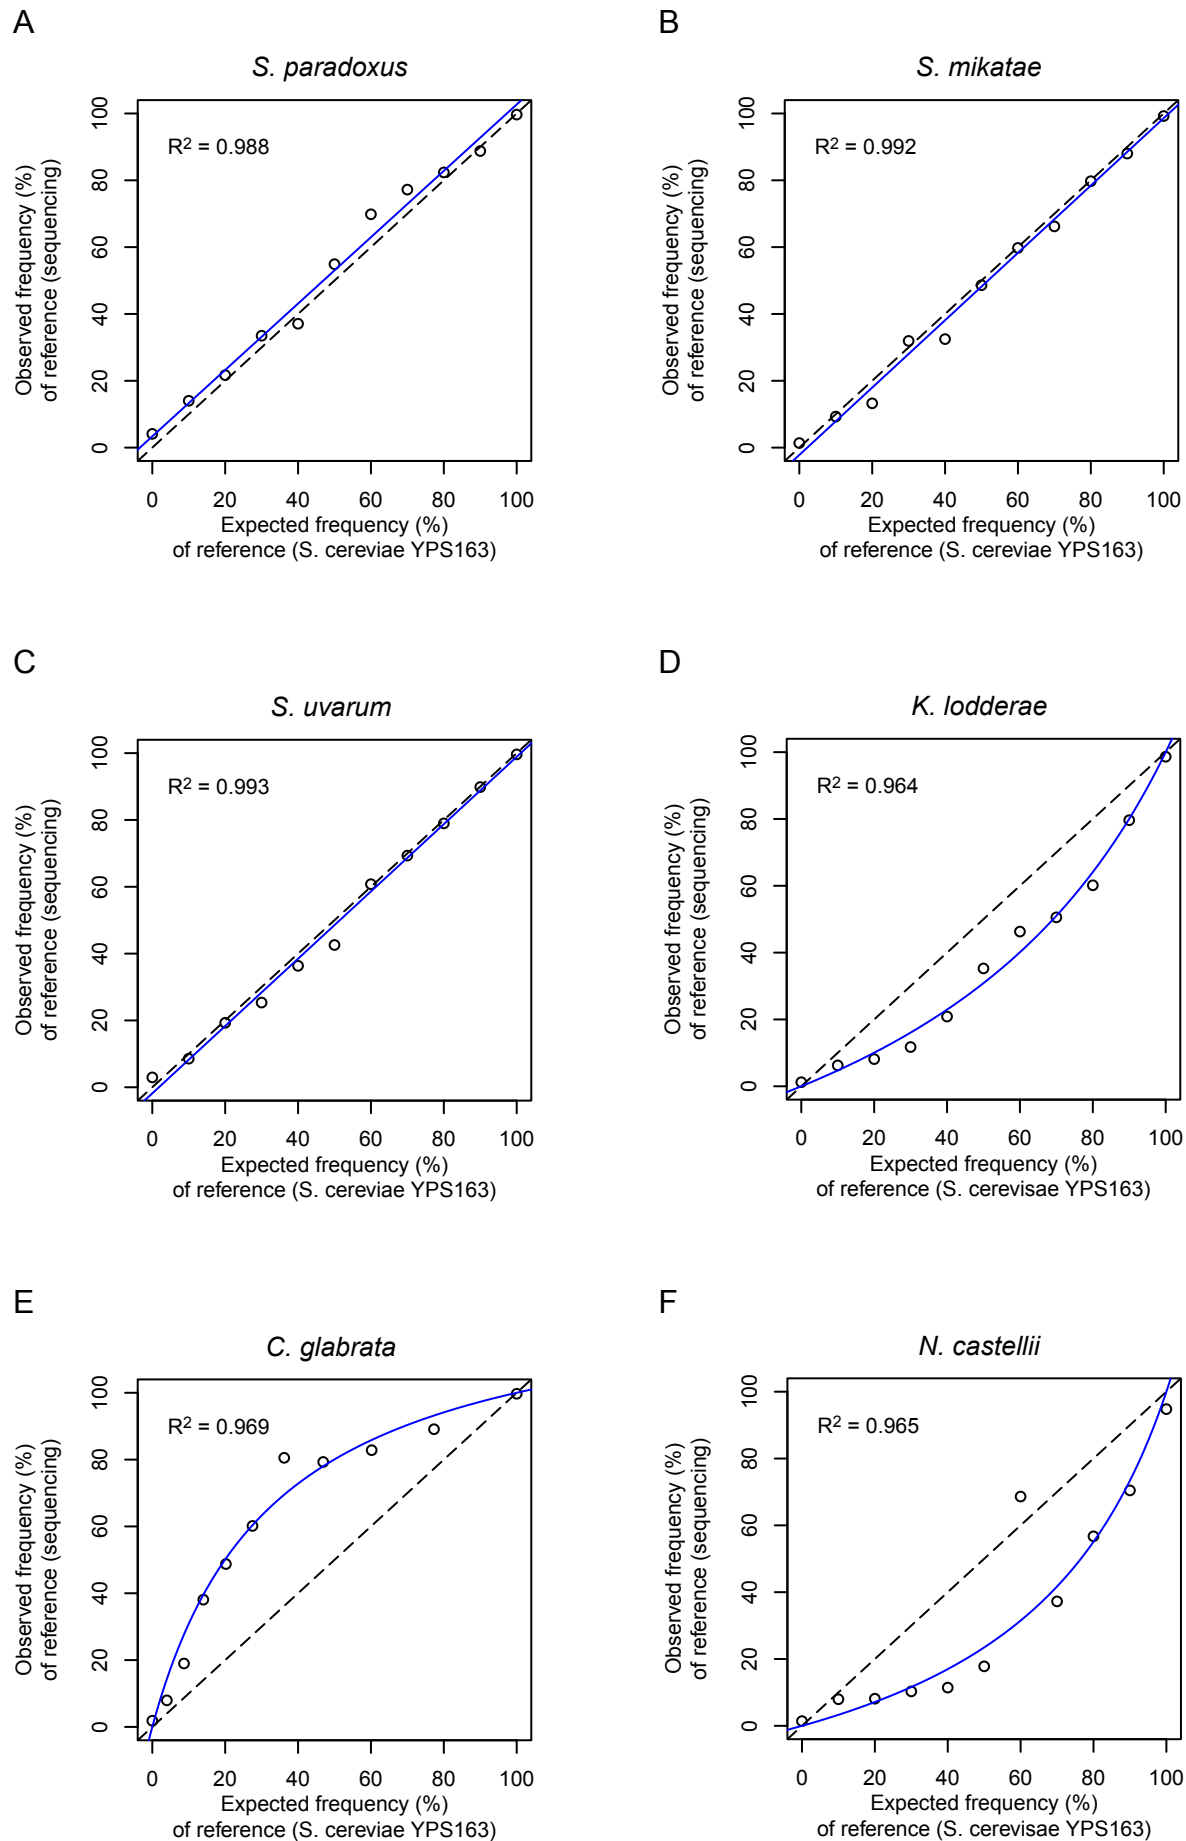

Figure S2 G-K

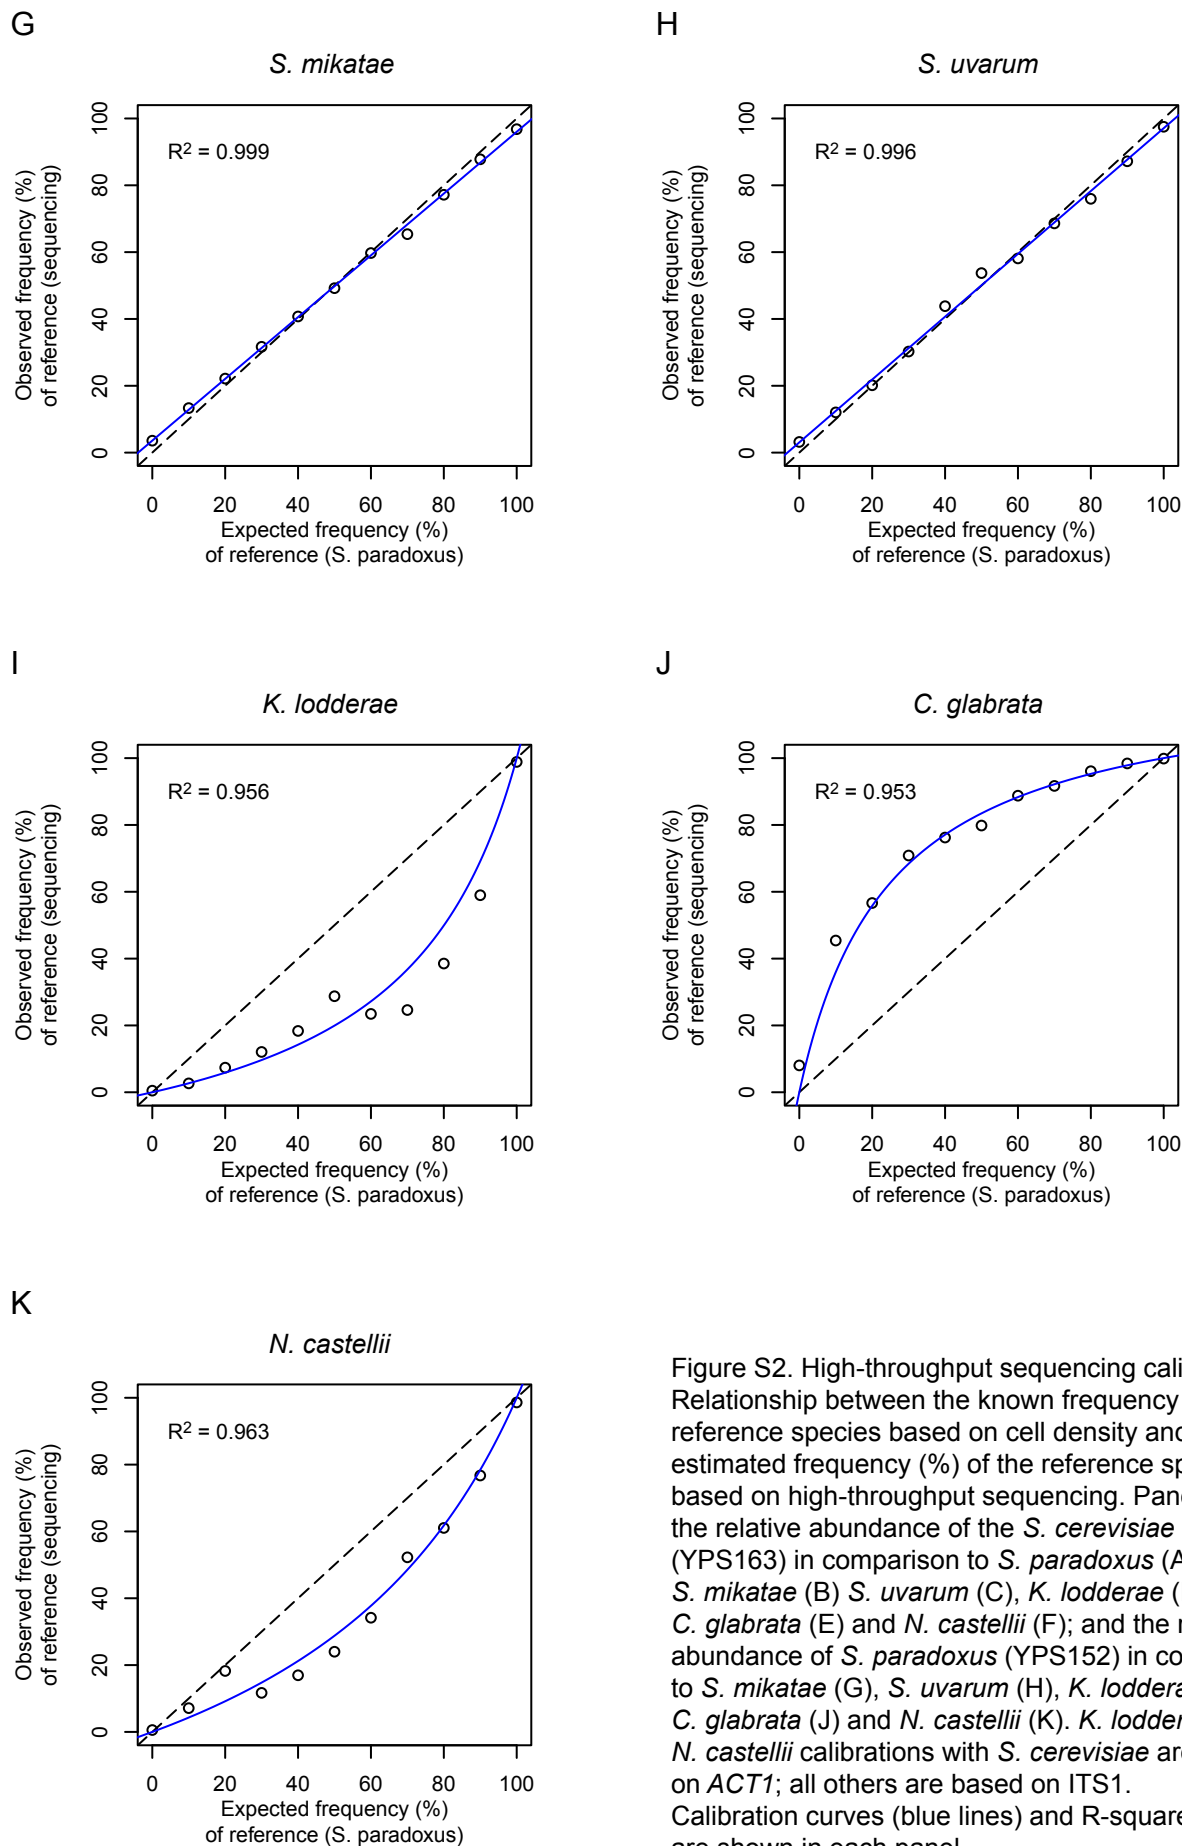

Figure S2. High-throughput sequencing calibration. Relationship between the known frequency (%) of the reference species based on cell density and the estimated frequency (%) of the reference species based on high-throughput sequencing. Panels show the relative abundance of the *S. cerevisiae* reference (YPS163) in comparison to *S. paradoxus* (A), *S. mikatae* (B) *S. uvarum* (C), *K. lodderae* (D), *C. glabrata* (E) and *N. castellii* (F); and the relative abundance of *S. paradoxus* (YPS152) in comparison to *S. mikatae* (G), *S. uvarum* (H), *K. lodderae* (I), *C. glabrata* (J) and *N. castellii* (K). *K. lodderae* and *N. castellii* calibrations with *S. cerevisiae* are based on *ACT1*; all others are based on ITS1. Calibration curves (blue lines) and R-squared values are shown in each panel.



Figure S3

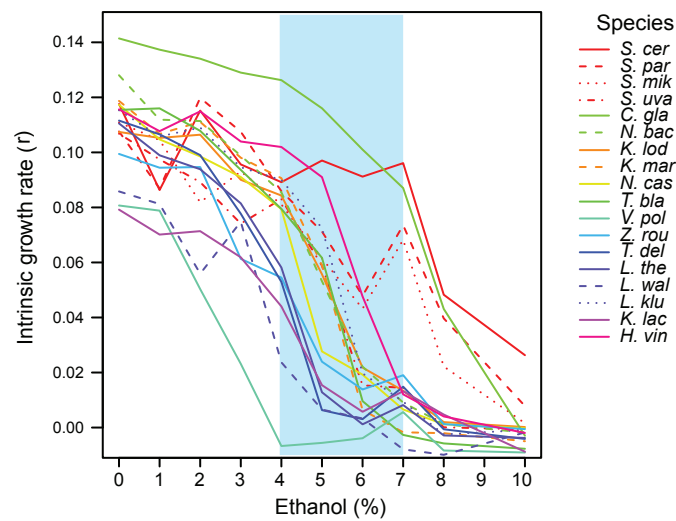

Figure S3. The effect of ethanol on the intrinsic growth rate of each species. Each line shows mean intrinsic growth rate ( $r$ ) of an individual species based on three replicates as a function of ethanol (%) added at the beginning of growth. Significant differences in the growth rate of each species and *S. cerevisiae* are shown for FDR < 0.01 (shaded region). Error bars have been omitted for clarity.

Figure S4 A-I

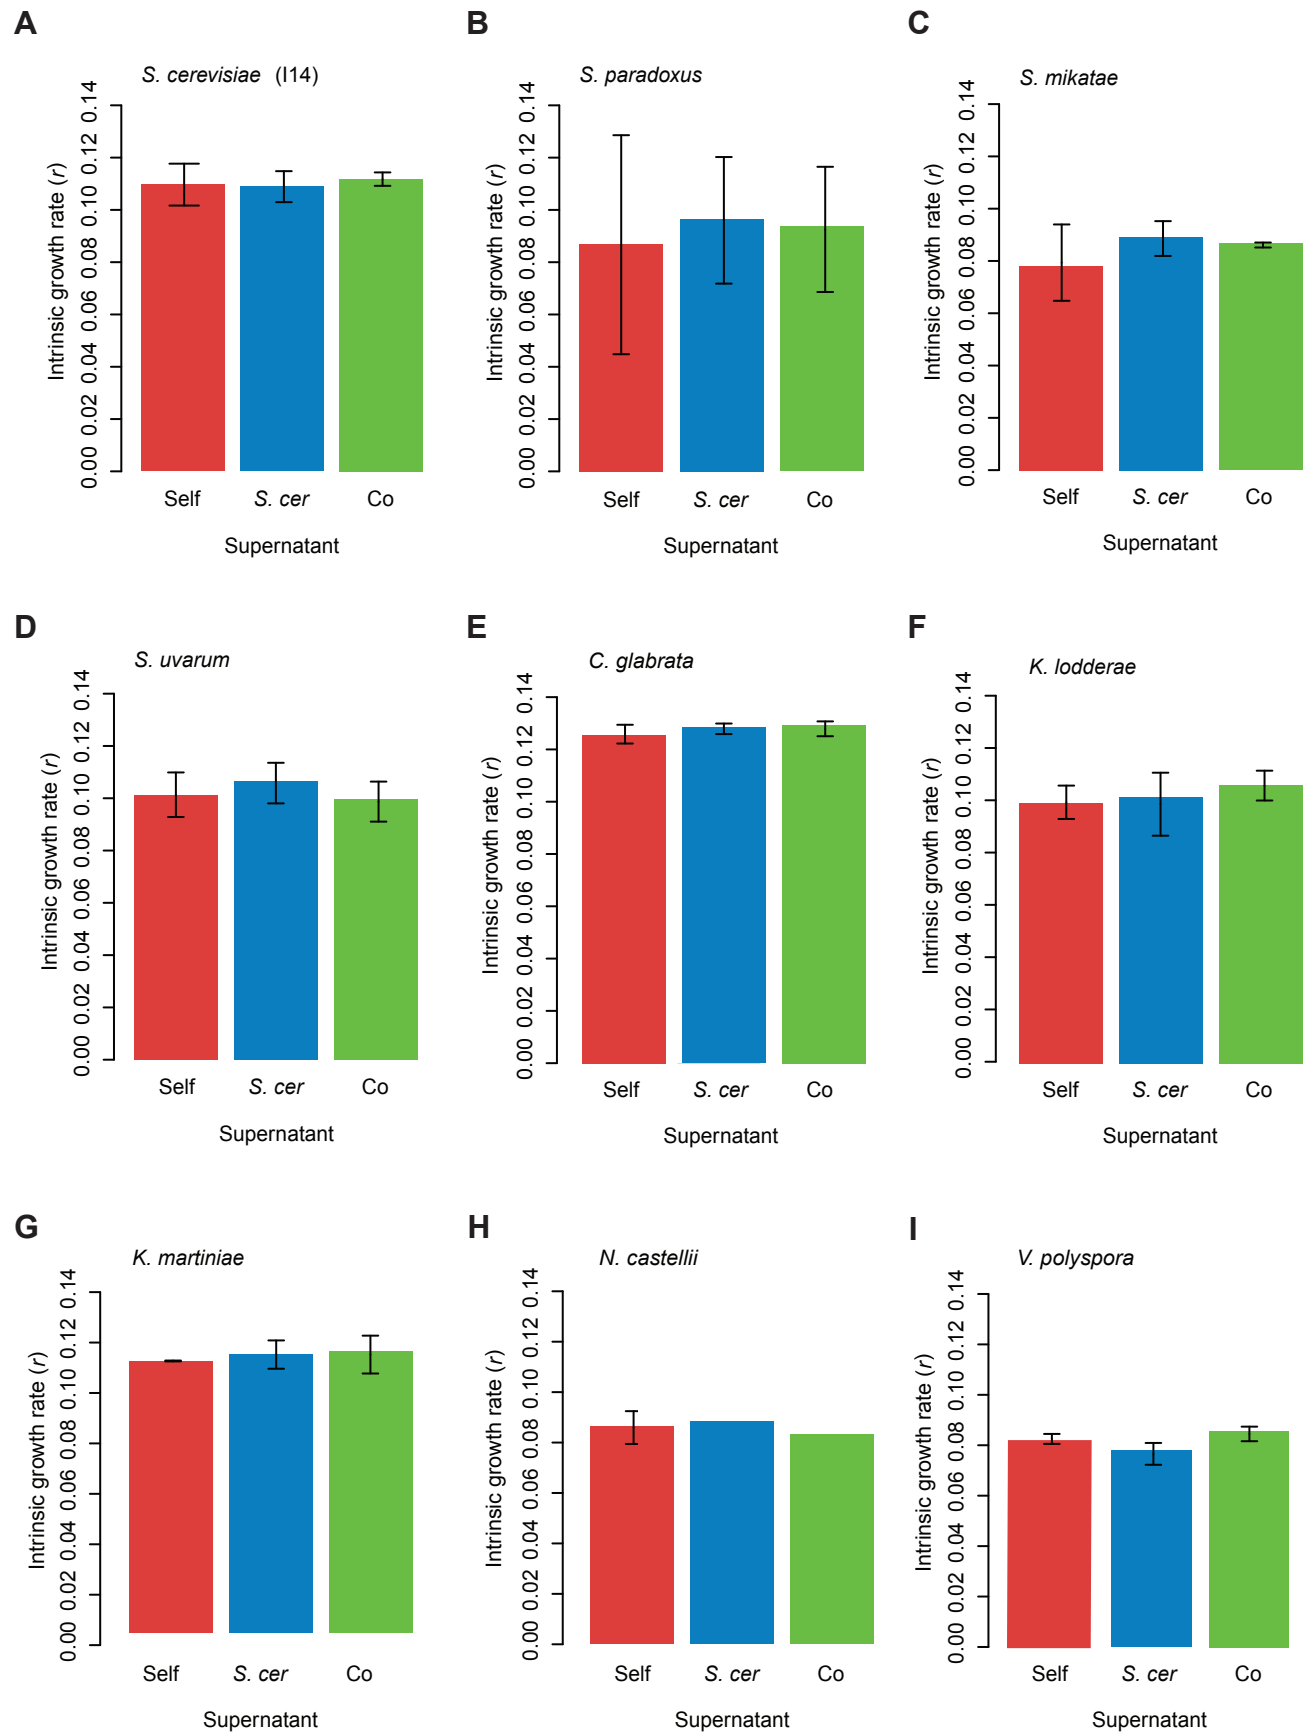

Figure S4 J-O

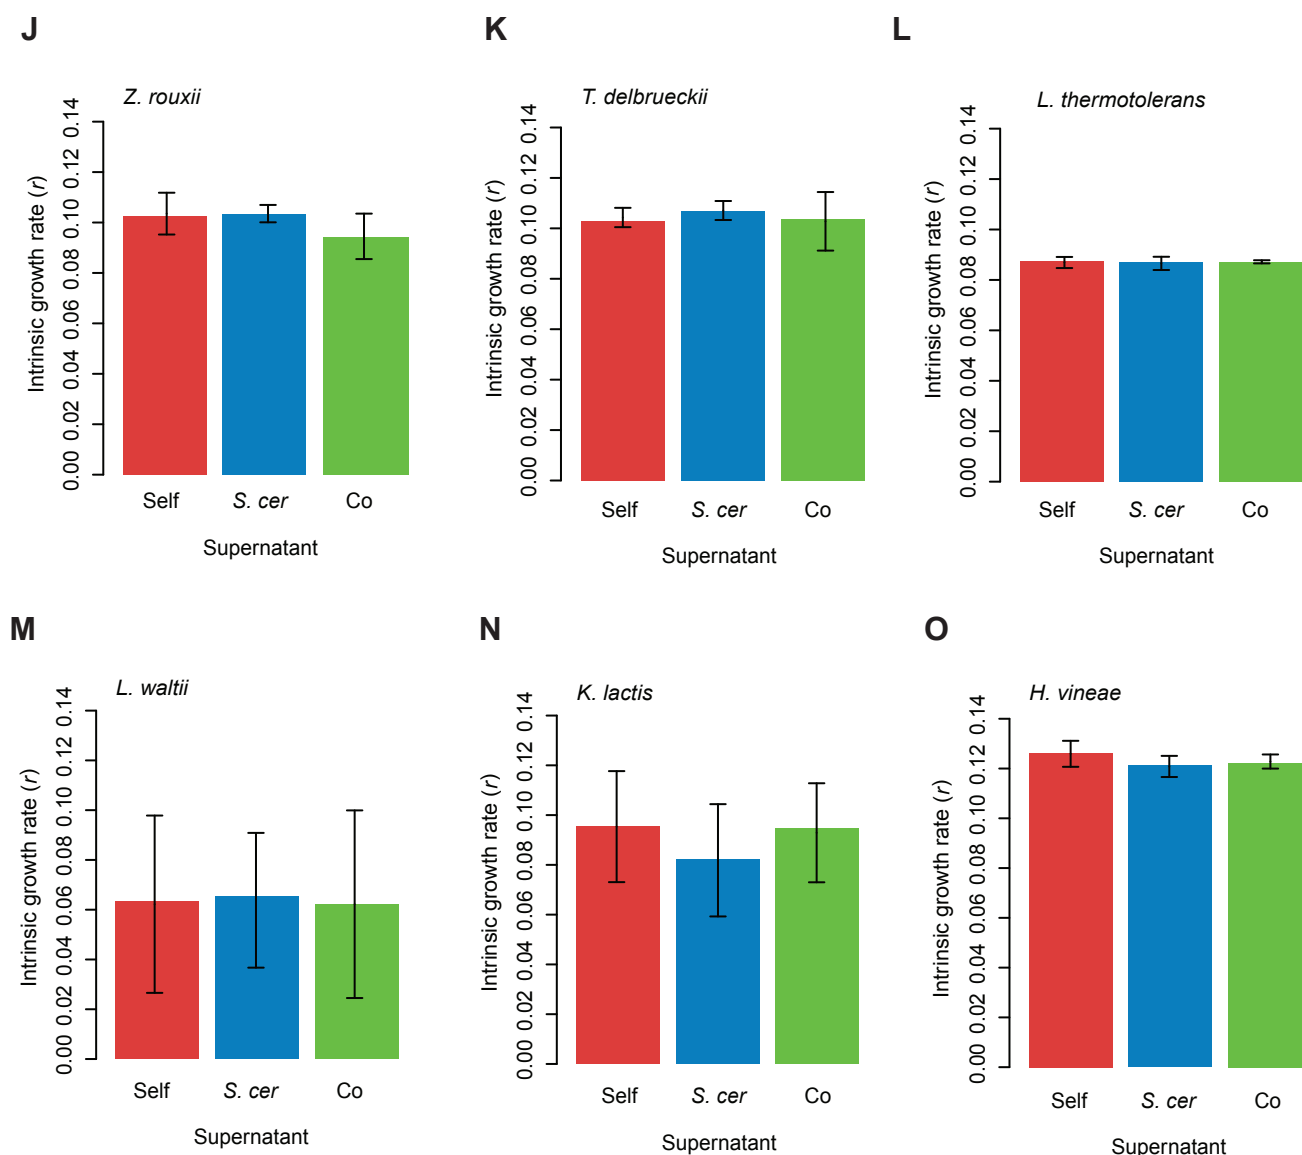

Figure S4. Intrinsic growth rate in YPD made with supernatant. The intrinsic growth rate of each species (A-O) in YPD made with the supernatant from each species' own supernatant when grown in mono-culture (red), the supernatant from *S. cerevisiae* (YPS163) grown in mono-culture (blue), and the supernatant from co-culture with *S. cerevisiae* (green). Species are *S. cerevisiae* (I14) (A), *S. paradoxus* (B), *S. mikatae* (C), *S. uvarum* (D), *K. lodderae* (F), *N. castellii* (G), *C. glabrata* (H), *V. polyspora* (I), *Z. rouxii* (J), *T. delbrueckii* (K), *L. thermotolerans* (L), *L. waltii* (M), *K. lactis* (N), and *H. vineae* (O). Bars and whiskers represent the mean and standard deviation of the growth rate.

Figure S5

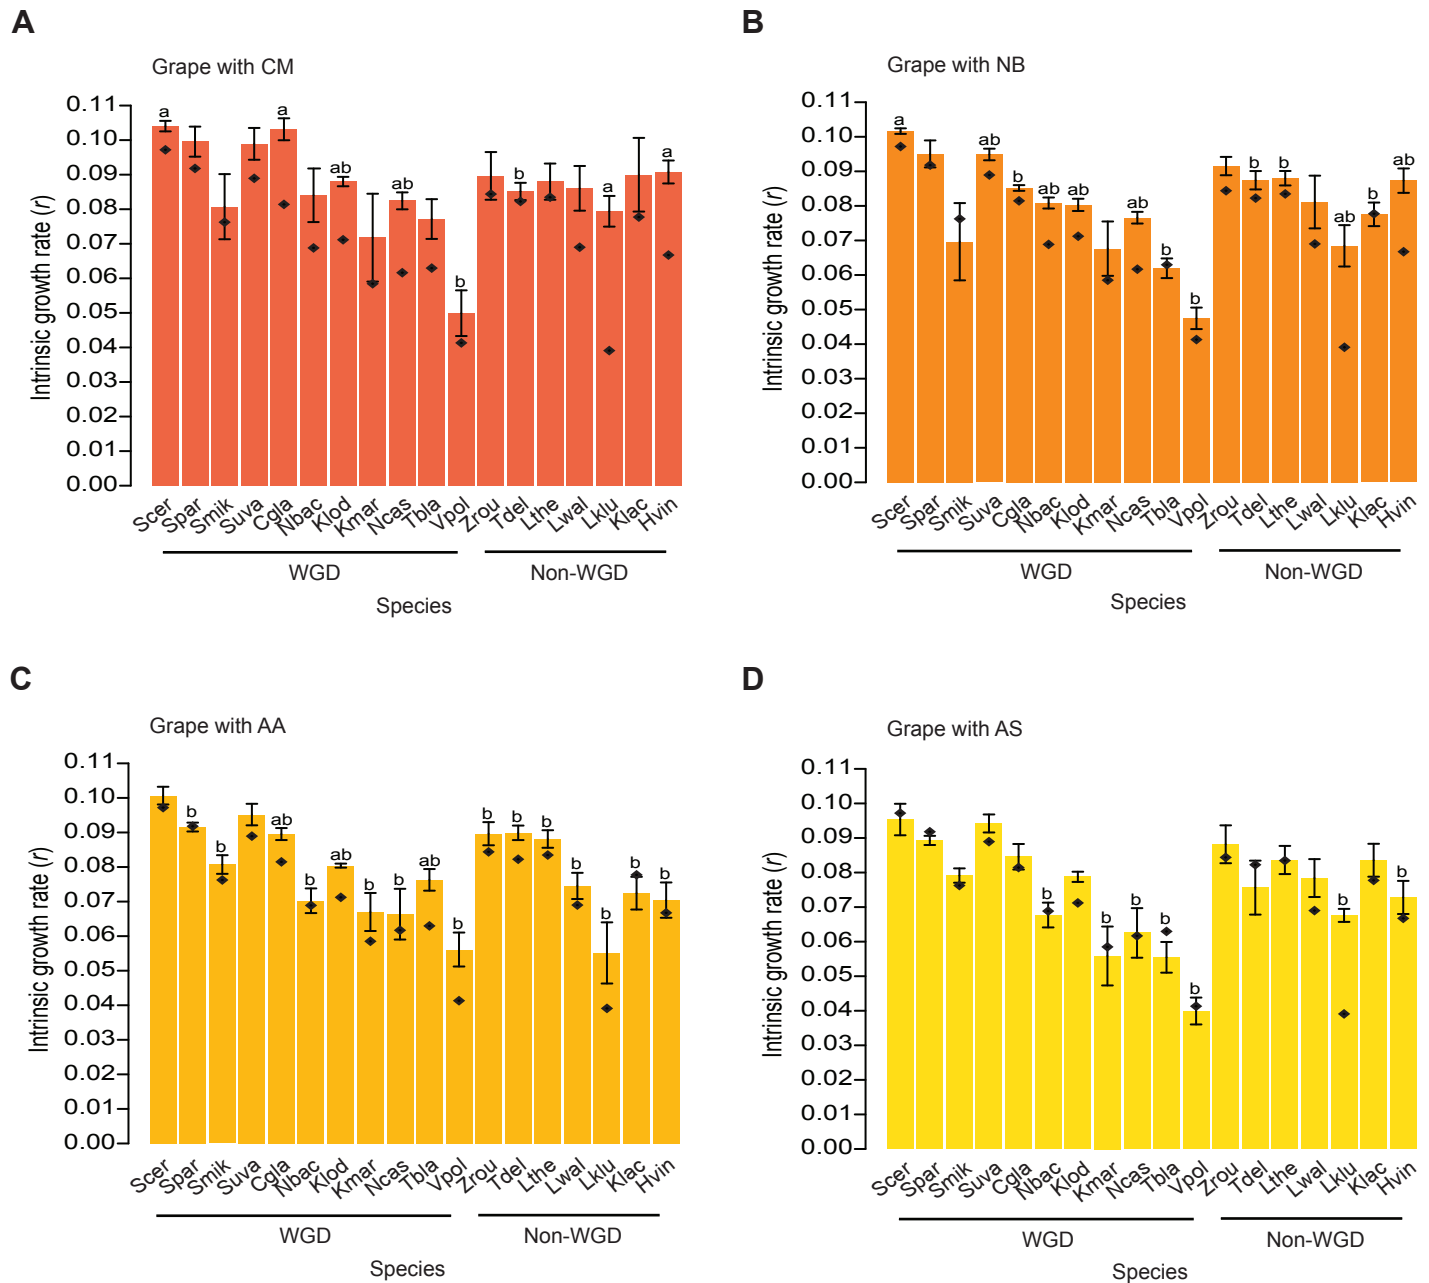

Figure S5. Intrinsic growth rate in Grape supplemented with various nutrients. The mean intrinsic growth rate of each species in Grape supplemented with CM (A), NB (B), AA (C) and AS (D). WGD and non-WGD species are indicated. Bars and whiskers represent the mean and standard deviation of the growth rate. Diamonds represent the average growth rate in Grape without supplements. Significant differences in the growth rate of each species with or without the added nutrient (a) and differences between *S. cerevisiae* and each species with the added nutrient (b) are labeled above each bar for FDR < 0.01.
